# Supplementary material
Source: publisher figshare collection journal article supplement (https://acs.figshare.com/ndownloader/files/3973234)
Supplement: Supplementary file 1 [file 3973234]

data_Compound_6
_audit_creation_date              2012-11-15
_audit_creation_method
;
  Olex2 1.2
  (compiled Nov  5 2012 18:25:38, GUI svn.r4372)
;
_publ_contact_author_address      ?
_publ_contact_author_email        ?
_publ_contact_author_name         ''
_publ_contact_author_phone        ?
_chemical_name_common             ?
_chemical_name_systematic         ?
_chemical_formula_moiety          '3(F7 Mo2 O4), 2(Br), 10(K)'
_chemical_formula_sum             'Br2 F21 K10 Mo6 O12'
_chemical_formula_weight          1717.46
_chemical_absolute_configuration  ad
_chemical_melting_point           ?
loop_
  _atom_type_symbol
  _atom_type_description
  _atom_type_scat_dispersion_real
  _atom_type_scat_dispersion_imag
  _atom_type_scat_source
 'Br' 'Br' -0.2901 2.4595
 'International Tables Vol C Tables 4.2.6.8 and 6.1.1.4'
 'F' 'F' 0.0171 0.0103 'International Tables Vol C Tables 4.2.6.8 and 6.1.1.4'
 'K' 'K' 0.2009 0.2494 'International Tables Vol C Tables 4.2.6.8 and 6.1.1.4'
 'Mo' 'Mo' -1.6832 0.6857
 'International Tables Vol C Tables 4.2.6.8 and 6.1.1.4'
 'O' 'O' 0.0106 0.0060 'International Tables Vol C Tables 4.2.6.8 and 6.1.1.4'

_space_group_crystal_system       'orthorhombic'
_space_group_IT_number            31
_symmetry_space_group_name_H-M          'P m n 21'
_space_group_name_Hall            'P 2ac -2'
loop_
  _space_group_symop_id
  _symmetry_equiv_pos_as_xyz
 1 'x, y, z'
 2 '-x+1/2, -y, z+1/2'
 3 '-x, y, z'
 4 'x+1/2, -y, z+1/2'

_cell_length_a                    20.0790(6)
_cell_length_b                    7.7580(2)
_cell_length_c                    11.4836(3)
_cell_angle_alpha                 90.00
_cell_angle_beta                  90.00
_cell_angle_gamma                 90.00
_cell_volume                      1788.83(8)
_cell_formula_units_Z             2
_cell_measurement_reflns_used     2898
_cell_measurement_temperature     99.99
_cell_measurement_theta_max       35.51
_cell_measurement_theta_min       3.76
_exptl_absorpt_coefficient_mu     5.587
_exptl_absorpt_correction_T_max   1
_exptl_absorpt_correction_T_min   0.4939
_exptl_absorpt_correction_type    'multiscan'
_exptl_absorpt_process_details
;
 TWINABS-2008/4 (Bruker,2010) was used for absorption correction.
 
For component 1:
 wR2(int) was 0.0687 before and 0.0464 after correction.
 The Ratio of minimum to maximum transmission not present.
 The \l/2 correction factor is Not present
 
For component 2:
 wR2(int) was 0.0642 before and 0.0460 after correction.
 The Ratio of minimum to maximum transmission not present.
 The \l/2 correction factor is Not present
 
For component 3:
 wR2(int) was 0.0821 before and 0.0512 after correction.
 The Ratio of minimum to maximum transmission is 0.79.
 The \l/2 correction factor is Not present
;
_exptl_crystal_colour             'clear orange'
_exptl_crystal_colour_lustre      clear
_exptl_crystal_colour_primary     orange
_exptl_crystal_density_diffrn     3.189
_exptl_crystal_density_meas       .
_exptl_crystal_density_method     'not measured'
_exptl_crystal_description        'block'
_exptl_crystal_F_000              1594
_exptl_crystal_size_max           0.147
_exptl_crystal_size_mid           0.069
_exptl_crystal_size_min           0.044
_exptl_special_details
;
 ? 
;
_diffrn_reflns_av_R_equivalents   0.0000
_diffrn_reflns_av_unetI/netI      0.0263
_diffrn_reflns_limit_h_max        35
_diffrn_reflns_limit_h_min        0
_diffrn_reflns_limit_k_max        12
_diffrn_reflns_limit_k_min        0
_diffrn_reflns_limit_l_max        20
_diffrn_reflns_limit_l_min        0
_diffrn_reflns_number             5391
_diffrn_reflns_theta_full         25.00
_diffrn_reflns_theta_max          38.66
_diffrn_reflns_theta_min          2.03
_diffrn_ambient_temperature       99.99
_diffrn_detector_area_resol_mean  8
_diffrn_measured_fraction_theta_full 0.996
_diffrn_measured_fraction_theta_max 0.739
_diffrn_measurement_device_type   'Bruker Kappa APEX CCD area detector'
_diffrn_measurement_method        '\w and \f scans'
_diffrn_radiation_monochromator   graphite
_diffrn_radiation_type            MoK\a
_diffrn_radiation_wavelength      0.71073
_diffrn_source                    'sealed tube'
_diffrn_special_details           ?
_diffrn_standards_number          0
_reflns_number_gt                 6167
_reflns_number_total              5391
_reflns_threshold_expression      >2sigma(I)
_computing_cell_refinement        'SAINT V7.23A (Bruker, 2005)'
_computing_data_collection        'APEX2 V2.1-4 (Bruker, 2007)'
_computing_data_reduction         'Bruker SAINT'
_computing_molecular_graphics
;
O. V. Dolomanov, L. J. Bourhis, R. J. Gildea, J. A. K. Howard and H. Puschmann,
OLEX2: a complete structure solution, refinement and analysis program.
J. Appl. Cryst. (2009). 42, 339-341.
;
_computing_publication_material
;
O. V. Dolomanov, L. J. Bourhis, R. J. Gildea, J. A. K. Howard and H. Puschmann,
OLEX2: a complete structure solution, refinement and analysis program.
J. Appl. Cryst. (2009). 42, 339-341.
;
_computing_structure_refinement
;
XL, G.M. Sheldrick, Acta Cryst.
(2008). A64, 112-122
;
_computing_structure_solution
;
XS, G.M. Sheldrick, Acta Cryst.
(2008). A64, 112-122
;
_refine_diff_density_max          3.989
_refine_diff_density_min          -4.609
_refine_diff_density_rms          0.340
_refine_ls_abs_structure_details  'Flack H D (1983), Acta Cryst. A39, 876-881'
_refine_ls_abs_structure_Flack    0.03(3)
_refine_ls_extinction_coef        ?
_refine_ls_extinction_method      none
_refine_ls_goodness_of_fit_ref    1.231
_refine_ls_matrix_type            full
_refine_ls_number_parameters      250
_refine_ls_number_reflns          6426
_refine_ls_number_restraints      1
_refine_ls_R_factor_all           0.0467
_refine_ls_R_factor_gt            0.0434
_refine_ls_restrained_S_all       1.231
_refine_ls_shift/su_max           0.000
_refine_ls_shift/su_mean          0.000
_refine_ls_structure_factor_coef  Fsqd
_refine_ls_weighting_details
'calc w=1/[\s^2^(Fo^2^)+(0.1000P)^2^+0.0000P] where P=(Fo^2^+2Fc^2^)/3'
_refine_ls_weighting_scheme       calc
_refine_ls_wR_factor_gt           0.1385
_refine_ls_wR_factor_ref          0.1421
_refine_special_details
;
 Refinement of F^2^ against ALL reflections.  The weighted R-factor wR and 
 goodness of fit S are based on F^2^, conventional R-factors R are based 
 on F, with F set to zero for negative F^2^. The threshold expression of 
 F^2^ > 2sigma(F^2^) is used only for calculating R-factors(gt) etc. and is 
 not relevant to the choice of reflections for refinement.  R-factors based 
 on F^2^ are statistically about twice as large as those based on F, and R- 
 factors based on ALL data will be even larger. 
;
_olex2_refinement_description
;
1. Shared sites
{F1, O1}
{F3, O3}
{F4, O4}
{F5, O5}
{F6, O6}
{F7, O7}
{F8, O8}
{F10, O10}
{F11, O11}
{F12, O12}
{F13, O13}
{F15, O15}
2. Uiso/Uaniso restraints and constraints
Uanis(F1) = Uanis(O1)
Uanis(F3) = Uanis(O3)
Uanis(F4) = Uanis(O4)
Uanis(F5) = Uanis(O5)
Uanis(F6) = Uanis(O6)
Uanis(F7) = Uanis(O7)
Uanis(F8) = Uanis(O8)
Uanis(F10) = Uanis(O10)
Uanis(F11) = Uanis(O11)
Uanis(F12) = Uanis(O12)
Uanis(F13) = Uanis(O13)
Uanis(F15) = Uanis(O15)
3. Others
 Fixed Sof: Br1(0.25) Br3(0.25) F1(0.75) F3(0.75) F4(0.75) F5(0.75) F6(0.75)
 F7(0.75) F8(0.75) F10(0.75) F11(0.75) F12(0.75) F13(0.75) F15(0.75) O1(0.25)
 O3(0.25) O4(0.25) O5(0.25) O6(0.25) O7(0.25) O8(0.25) O10(0.25) O11(0.25)
 O12(0.25) O13(0.25) O15(0.25)
;
_atom_sites_solution_hydrogens    '.'
_atom_sites_solution_primary      direct
_atom_sites_solution_secondary    difmap
loop_
  _atom_site_label
  _atom_site_type_symbol
  _atom_site_fract_x
  _atom_site_fract_y
  _atom_site_fract_z
  _atom_site_U_iso_or_equiv
  _atom_site_adp_type
  _atom_site_occupancy
  _atom_site_symmetry_multiplicity
  _atom_site_calc_flag
  _atom_site_refinement_flags
  _atom_site_disorder_assembly
  _atom_site_disorder_group
 Mo1 Mo 0.19783(4) 0.05027(9) 0.46809(8) 0.01014(14) Uani 1 1 d . . .
 Mo2 Mo 0.30140(5) 0.51481(8) 0.36119(9) 0.01049(14) Uani 1 1 d . . .
 Mo3 Mo 0.0000 0.03390(12) 0.05543(11) 0.0091(2) Uani 1 2 d S . .
 Mo4 Mo 0.0000 0.57431(11) 0.27168(10) 0.00885(17) Uani 1 2 d S . .
 Br1 Br 0.5000 0.9069(17) 0.1700(5) 0.085(3) Uani 0.50 2 d SP . .
 Br2 Br 0.5000 0.2681(9) 0.1676(2) 0.0965(19) Uani 1 2 d S . .
 Br3 Br 0.5000 0.5966(19) 0.1737(4) 0.096(4) Uani 0.50 2 d SP . .
 K1 K 0.17376(10) 0.2638(2) 0.17807(19) 0.0110(3) Uani 1 1 d . . .
 K2 K 0.34364(11) 0.2322(2) 0.64455(18) 0.0107(3) Uani 1 1 d . . .
 K3 K 0.35538(13) 0.0441(3) 0.2803(2) 0.0192(5) Uani 1 1 d . . .
 K4 K 0.37092(13) 0.4713(3) 0.0136(2) 0.0165(4) Uani 1 1 d . . .
 K5 K 0.0000 0.0471(4) 0.3957(4) 0.0215(7) Uani 1 2 d S . .
 K6 K 0.5000 0.4312(3) 0.4429(3) 0.0153(6) Uani 1 2 d S . .
 F1 F 0.0658(3) 0.7256(7) 0.3372(6) 0.0119(11) Uani 0.75 1 d P . .
 F2 F 0.2554(3) 0.2592(7) 0.3884(6) 0.0168(13) Uani 1 1 d . . .
 F3 F 0.0696(4) 0.4827(6) 0.1724(6) 0.0102(13) Uani 0.75 1 d P . .
 F4 F 0.1240(3) 0.1913(8) 0.4090(6) 0.0151(12) Uani 0.75 1 d P . .
 F5 F 0.2003(3) 0.2021(8) 0.6033(6) 0.0162(12) Uani 0.75 1 d P . .
 F6 F 0.2121(3) 0.5573(7) 0.3015(7) 0.0146(13) Uani 0.75 1 d P . .
 F7 F 0.2870(3) -0.0235(8) 0.5148(7) 0.0132(12) Uani 0.75 1 d P . .
 F8 F 0.2347(4) 0.4438(8) 0.0167(7) 0.0189(14) Uani 0.75 1 d P . .
 F10 F 0.2890(4) 0.0330(8) 0.8111(6) 0.0132(12) Uani 0.75 1 d P . .
 F11 F 0.3244(4) 0.3929(8) 0.2211(7) 0.0213(14) Uani 0.75 1 d P . .
 F12 F 0.3735(3) 0.3946(8) 0.4415(7) 0.0187(14) Uani 0.75 1 d P . .
 F13 F 0.0673(4) -0.0774(8) -0.0368(7) 0.0196(14) Uani 0.75 1 d P . .
 F14 F 0.0000 0.7725(8) 0.1336(8) 0.0112(15) Uani 1 2 d S . .
 F15 F 0.0670(3) 0.0641(8) 0.1757(6) 0.0146(12) Uani 0.75 1 d P . .
 O1 O 0.0658(3) 0.7256(7) 0.3372(6) 0.0119(11) Uani 0.25 1 d P . .
 O3 O 0.0696(4) 0.4827(6) 0.1724(6) 0.0102(13) Uani 0.25 1 d P . .
 O4 O 0.1240(3) 0.1913(8) 0.4090(6) 0.0151(12) Uani 0.25 1 d P . .
 O5 O 0.2003(3) 0.2021(8) 0.6033(6) 0.0162(12) Uani 0.25 1 d P . .
 O6 O 0.2121(3) 0.5573(7) 0.3015(7) 0.0146(13) Uani 0.25 1 d P . .
 O7 O 0.2870(3) -0.0235(8) 0.5148(7) 0.0132(12) Uani 0.25 1 d P . .
 O8 O 0.2347(4) 0.4438(8) 0.0167(7) 0.0189(14) Uani 0.25 1 d P . .
 O10 O 0.2890(4) 0.0330(8) 0.8111(6) 0.0132(12) Uani 0.25 1 d P . .
 O11 O 0.3244(4) 0.3929(8) 0.2211(7) 0.0213(14) Uani 0.25 1 d P . .
 O12 O 0.3735(3) 0.3946(8) 0.4415(7) 0.0187(14) Uani 0.25 1 d P . .
 O13 O 0.0673(4) -0.0774(8) -0.0368(7) 0.0196(14) Uani 0.25 1 d P . .
 O15 O 0.0670(3) 0.0641(8) 0.1757(6) 0.0146(12) Uani 0.25 1 d P . .
 O16 O 0.3391(5) 0.7049(9) 0.3391(8) 0.0219(17) Uani 1 1 d . . .
 O17 O 0.1529(5) -0.1170(10) 0.5295(8) 0.0232(18) Uani 1 1 d . . .
 O18 O 0.0000 0.2330(13) -0.0085(12) 0.019(2) Uani 1 2 d S . .
 O19 O 0.0000 0.4183(13) 0.3813(13) 0.020(2) Uani 1 2 d S . .

loop_
  _atom_site_aniso_label
  _atom_site_aniso_U_11
  _atom_site_aniso_U_22
  _atom_site_aniso_U_33
  _atom_site_aniso_U_23
  _atom_site_aniso_U_13
  _atom_site_aniso_U_12
 Mo1 0.0119(3) 0.0108(2) 0.0077(4) 0.0004(2) -0.0008(3) -0.0011(2)
 Mo2 0.0121(4) 0.0090(2) 0.0104(4) 0.0002(3) -0.0012(4) -0.0008(2)
 Mo3 0.0105(5) 0.0084(3) 0.0084(6) 0.0005(3) 0.000 0.000
 Mo4 0.0084(4) 0.0097(3) 0.0084(5) 0.0010(3) 0.000 0.000
 Br1 0.0137(19) 0.230(11) 0.010(2) -0.009(4) 0.000 0.000
 Br2 0.0149(10) 0.256(6) 0.0190(12) 0.007(2) 0.000 0.000
 Br3 0.021(2) 0.257(13) 0.009(2) 0.013(4) 0.000 0.000
 K1 0.0117(8) 0.0100(5) 0.0112(9) -0.0008(5) 0.0007(7) -0.0007(5)
 K2 0.0112(8) 0.0106(5) 0.0103(9) -0.0019(5) 0.0020(6) -0.0038(5)
 K3 0.0245(11) 0.0159(7) 0.0174(11) 0.0027(7) -0.0083(9) -0.0016(6)
 K4 0.0208(11) 0.0153(7) 0.0134(10) 0.0018(7) 0.0039(9) -0.0001(6)
 K5 0.0183(15) 0.0157(12) 0.030(2) -0.0014(11) 0.000 0.000
 K6 0.0160(13) 0.0140(10) 0.0160(16) -0.0009(9) 0.000 0.000
 F1 0.011(3) 0.016(2) 0.009(3) -0.0029(19) -0.006(2) -0.0030(17)
 F2 0.019(3) 0.012(2) 0.019(3) 0.0032(19) -0.003(2) -0.0057(18)
 F3 0.013(3) 0.0091(19) 0.008(3) -0.0054(17) -0.001(2) 0.0032(17)
 F4 0.022(3) 0.017(2) 0.007(3) -0.0004(19) -0.007(2) 0.010(2)
 F5 0.017(3) 0.020(2) 0.012(3) -0.007(2) -0.004(2) -0.002(2)
 F6 0.016(3) 0.013(2) 0.015(4) 0.0003(19) -0.004(2) 0.0021(19)
 F7 0.014(3) 0.0110(19) 0.015(3) -0.0061(19) -0.012(3) 0.0012(18)
 F8 0.027(4) 0.021(3) 0.009(3) 0.007(2) -0.005(3) -0.009(2)
 F10 0.021(3) 0.011(2) 0.007(3) 0.0063(18) 0.000(3) -0.0016(19)
 F11 0.031(4) 0.016(2) 0.017(4) -0.002(2) 0.014(3) 0.006(2)
 F12 0.010(3) 0.024(3) 0.022(4) 0.009(2) -0.004(2) 0.003(2)
 F13 0.027(3) 0.019(2) 0.013(3) -0.004(2) 0.015(3) 0.007(2)
 F14 0.016(4) 0.007(3) 0.011(4) 0.001(2) 0.000 0.000
 F15 0.015(3) 0.021(3) 0.008(3) 0.000(2) -0.009(2) -0.009(2)
 O1 0.011(3) 0.016(2) 0.009(3) -0.0029(19) -0.006(2) -0.0030(17)
 O3 0.013(3) 0.0091(19) 0.008(3) -0.0054(17) -0.001(2) 0.0032(17)
 O4 0.022(3) 0.017(2) 0.007(3) -0.0004(19) -0.007(2) 0.010(2)
 O5 0.017(3) 0.020(2) 0.012(3) -0.007(2) -0.004(2) -0.002(2)
 O6 0.016(3) 0.013(2) 0.015(4) 0.0003(19) -0.004(2) 0.0021(19)
 O7 0.014(3) 0.0110(19) 0.015(3) -0.0061(19) -0.012(3) 0.0012(18)
 O8 0.027(4) 0.021(3) 0.009(3) 0.007(2) -0.005(3) -0.009(2)
 O10 0.021(3) 0.011(2) 0.007(3) 0.0063(18) 0.000(3) -0.0016(19)
 O11 0.031(4) 0.016(2) 0.017(4) -0.002(2) 0.014(3) 0.006(2)
 O12 0.010(3) 0.024(3) 0.022(4) 0.009(2) -0.004(2) 0.003(2)
 O13 0.027(3) 0.019(2) 0.013(3) -0.004(2) 0.015(3) 0.007(2)
 O15 0.015(3) 0.021(3) 0.008(3) 0.000(2) -0.009(2) -0.009(2)
 O16 0.033(5) 0.016(3) 0.017(4) 0.006(3) -0.004(3) -0.007(3)
 O17 0.034(5) 0.019(3) 0.017(4) 0.005(3) -0.006(3) -0.010(3)
 O18 0.019(5) 0.014(4) 0.024(7) 0.010(4) 0.000 0.000
 O19 0.014(5) 0.015(4) 0.032(8) 0.010(4) 0.000 0.000

_geom_special_details
;
 All esds (except the esd in the dihedral angle between two l.s. planes) 
 are estimated using the full covariance matrix.  The cell esds are taken 
 into account individually in the estimation of esds in distances, angles 
 and torsion angles; correlations between esds in cell parameters are only 
 used when they are defined by crystal symmetry.  An approximate (isotropic) 
 treatment of cell esds is used for estimating esds involving l.s. planes. 
;
loop_
  _geom_bond_atom_site_label_1
  _geom_bond_atom_site_label_2
  _geom_bond_distance
  _geom_bond_site_symmetry_2
  _geom_bond_publ_flag
 Mo1 F2 2.191(6) . ?
 Mo1 F4 1.964(6) . ?
 Mo1 F5 1.949(6) . ?
 Mo1 F7 1.955(7) . ?
 Mo1 F10 1.933(7) 2_554 ?
 Mo1 O10 1.933(7) 2_554 ?
 Mo1 O17 1.731(8) . ?
 Mo2 F2 2.210(5) . ?
 Mo2 F6 1.947(7) . ?
 Mo2 F8 1.954(7) 2_565 ?
 Mo2 F11 1.922(7) . ?
 Mo2 F12 1.953(6) . ?
 Mo2 O8 1.954(7) 2_565 ?
 Mo2 O16 1.677(7) . ?
 Mo3 F13 1.922(6) . ?
 Mo3 F13 1.922(6) 3 ?
 Mo3 F14 2.218(7) 1_545 ?
 Mo3 F15 1.943(7) . ?
 Mo3 F15 1.943(7) 3 ?
 Mo3 O13 1.922(6) 3 ?
 Mo3 O15 1.943(7) 3 ?
 Mo3 O18 1.710(10) . ?
 Mo4 F1 1.921(5) 3 ?
 Mo4 F1 1.921(5) . ?
 Mo4 F3 1.939(7) . ?
 Mo4 F3 1.939(7) 3 ?
 Mo4 F14 2.208(8) . ?
 Mo4 O1 1.921(5) 3 ?
 Mo4 O3 1.939(7) 3 ?
 Mo4 O19 1.746(11) . ?
 Br1 Br3 2.408(15) . ?
 Br1 K3 3.342(5) 1_565 ?
 Br1 K3 3.342(5) 3_665 ?
 Br1 K5 3.171(7) 2_564 ?
 Br2 Br3 2.549(13) . ?
 Br2 K3 3.623(4) 3_655 ?
 Br2 K3 3.623(4) . ?
 Br2 K4 3.511(4) . ?
 Br2 K4 3.511(4) 3_655 ?
 Br2 K6 3.405(5) . ?
 Br3 K4 3.323(6) 3_655 ?
 Br3 K4 3.323(6) . ?
 Br3 K6 3.348(8) . ?
 K1 F3 2.694(6) . ?
 K1 F6 2.790(7) . ?
 K1 F7 2.759(7) 2_554 ?
 K1 F8 2.623(7) . ?
 K1 F10 2.863(7) 2_554 ?
 K1 F15 2.645(6) . ?
 K1 O7 2.759(7) 2_554 ?
 K1 O10 2.863(7) 2_554 ?
 K2 F1 2.883(8) 2_565 ?
 K2 F3 2.833(7) 2_565 ?
 K2 F6 2.678(7) 2_565 ?
 K2 F7 2.729(6) . ?
 K2 F10 2.692(7) . ?
 K2 F12 2.717(8) . ?
 K2 O1 2.883(8) 2_565 ?
 K2 O3 2.833(7) 2_565 ?
 K2 O6 2.678(7) 2_565 ?
 K3 F2 2.891(7) . ?
 K3 F5 3.005(8) 2_554 ?
 K3 F7 3.068(8) . ?
 K3 F10 2.982(8) 2_554 ?
 K3 F11 2.858(7) . ?
 K3 F13 2.624(7) 2 ?
 K3 O5 3.005(8) 2_554 ?
 K3 O10 2.982(8) 2_554 ?
 K3 O13 2.624(7) 2 ?
 K3 O16 2.737(8) 1_545 ?
 K3 O17 2.940(10) 2_554 ?
 K4 F1 2.837(6) 2_564 ?
 K4 F4 2.882(6) 2_564 ?
 K4 F6 2.960(8) 2_564 ?
 K4 F8 2.744(9) . ?
 K4 F11 2.631(8) . ?
 K4 O1 2.837(6) 2_564 ?
 K4 O4 2.882(6) 2_564 ?
 K4 O5 3.086(7) 2_564 ?
 K4 O6 2.960(8) 2_564 ?
 K4 O17 2.795(8) 2_554 ?
 K5 F1 2.901(6) 3_545 ?
 K5 F4 2.733(7) 3 ?
 K5 F4 2.733(7) . ?
 K5 F15 2.865(9) . ?
 K5 F15 2.865(9) 3 ?
 K5 O1 2.901(6) 3_545 ?
 K5 O1 2.901(6) 1_545 ?
 K5 O4 2.733(7) 3 ?
 K5 O15 2.865(9) 3 ?
 K5 O19 2.885(10) . ?
 K6 F3 3.057(7) 4_565 ?
 K6 F3 3.057(7) 2_565 ?
 K6 F12 2.557(6) . ?
 K6 F12 2.557(6) 3_655 ?
 K6 F13 3.068(7) 2 ?
 K6 F14 2.701(9) 2_565 ?
 K6 O3 3.057(7) 2_565 ?
 K6 O3 3.057(7) 4_565 ?
 K6 O12 2.557(6) 3_655 ?
 K6 O13 3.068(7) 2 ?
 K6 O18 2.664(10) 2_565 ?
 F1 K2 2.883(8) 2_564 ?
 F1 K4 2.837(6) 2_565 ?
 F1 K5 2.901(6) 1_565 ?
 F3 K2 2.833(6) 2_564 ?
 F3 K6 3.057(7) 2_564 ?
 F4 K4 2.882(6) 2_565 ?
 F5 K3 3.005(8) 2 ?
 F5 K4 3.086(7) 2_565 ?
 F6 K2 2.678(7) 2_564 ?
 F6 K4 2.960(8) 2_565 ?
 F7 K1 2.759(7) 2 ?
 F8 Mo2 1.954(7) 2_564 ?
 F8 K2 3.309(8) 2_564 ?
 F10 Mo1 1.933(7) 2 ?
 F10 K1 2.863(7) 2 ?
 F10 K3 2.982(8) 2 ?
 F13 K2 2.996(8) 2_554 ?
 F13 K3 2.624(7) 2_554 ?
 F13 K6 3.068(7) 2_554 ?
 F14 Mo3 2.218(7) 1_565 ?
 F14 K2 3.142(2) 4_464 ?
 F14 K2 3.142(2) 2_564 ?
 F14 K6 2.701(9) 2_564 ?
 F15 K2 2.938(7) 2_554 ?
 O16 K3 2.737(8) 1_565 ?
 O17 K3 2.940(10) 2 ?
 O17 K4 2.795(8) 2 ?
 O18 K6 2.664(10) 2_564 ?
 O19 K4 3.124(9) 2_565 ?
 O19 K4 3.124(9) 4_465 ?

loop_
  _geom_angle_atom_site_label_1
  _geom_angle_atom_site_label_2
  _geom_angle_atom_site_label_3
  _geom_angle
  _geom_angle_site_symmetry_1
  _geom_angle_site_symmetry_3
  _geom_angle_publ_flag
 K1 Mo1 K3 152.10(6) . 2 ?
 F2 Mo1 K1 51.00(18) . . ?
 F2 Mo1 K3 133.05(18) . 2 ?
 F4 Mo1 K1 49.4(2) . . ?
 F4 Mo1 K3 102.7(2) . 2 ?
 F4 Mo1 F2 80.9(3) . . ?
 F5 Mo1 K1 116.3(2) . . ?
 F5 Mo1 K3 51.3(2) . 2 ?
 F5 Mo1 F2 82.7(3) . . ?
 F5 Mo1 F4 87.6(3) . . ?
 F5 Mo1 F7 86.3(3) . . ?
 F7 Mo1 K1 119.4(2) . . ?
 F7 Mo1 K3 86.7(2) . 2 ?
 F7 Mo1 F2 81.2(3) . . ?
 F7 Mo1 F4 161.7(3) . . ?
 F10 Mo1 K1 48.5(2) 2_554 . ?
 F10 Mo1 K3 148.3(2) 2_554 2 ?
 F10 Mo1 F2 77.6(3) 2_554 . ?
 F10 Mo1 F4 88.1(3) 2_554 . ?
 F10 Mo1 F5 160.2(3) 2_554 . ?
 F10 Mo1 F7 91.9(3) 2_554 . ?
 O10 Mo1 K1 48.5(2) 2_554 . ?
 O10 Mo1 K3 148.3(2) 2_554 2 ?
 O10 Mo1 F2 77.6(3) 2_554 . ?
 O10 Mo1 F4 88.1(3) 2_554 . ?
 O10 Mo1 F5 160.2(3) 2_554 . ?
 O10 Mo1 F7 91.9(3) 2_554 . ?
 O10 Mo1 F10 0.0(3) 2_554 2_554 ?
 O17 Mo1 K1 128.7(3) . . ?
 O17 Mo1 K3 47.7(3) . 2 ?
 O17 Mo1 F2 179.1(4) . . ?
 O17 Mo1 F4 99.5(4) . . ?
 O17 Mo1 F5 98.2(4) . . ?
 O17 Mo1 F7 98.4(4) . . ?
 O17 Mo1 F10 101.6(4) . 2_554 ?
 O17 Mo1 O10 101.6(4) . 2_554 ?
 K1 Mo2 K4 70.51(5) . 2_565 ?
 F2 Mo2 K1 49.04(18) . . ?
 F2 Mo2 K4 65.70(17) . 2_565 ?
 F6 Mo2 K1 43.91(18) . . ?
 F6 Mo2 K4 48.2(2) . 2_565 ?
 F6 Mo2 F2 79.5(3) . . ?
 F6 Mo2 F8 87.3(3) . 2_565 ?
 F6 Mo2 F12 158.3(3) . . ?
 F6 Mo2 O8 87.3(3) . 2_565 ?
 F8 Mo2 K1 109.6(2) 2_565 . ?
 F8 Mo2 K4 41.6(2) 2_565 2_565 ?
 F8 Mo2 F2 82.1(3) 2_565 . ?
 F11 Mo2 K1 56.9(2) . . ?
 F11 Mo2 K4 127.3(2) . 2_565 ?
 F11 Mo2 F2 77.1(3) . . ?
 F11 Mo2 F6 90.6(3) . . ?
 F11 Mo2 F8 159.2(3) . 2_565 ?
 F11 Mo2 F12 89.0(3) . . ?
 F11 Mo2 O8 159.2(3) . 2_565 ?
 F12 Mo2 K1 120.7(2) . . ?
 F12 Mo2 K4 117.5(2) . 2_565 ?
 F12 Mo2 F2 79.3(3) . . ?
 F12 Mo2 F8 85.5(3) . 2_565 ?
 F12 Mo2 O8 85.5(3) . 2_565 ?
 O8 Mo2 K1 109.6(2) 2_565 . ?
 O8 Mo2 K4 41.6(2) 2_565 2_565 ?
 O8 Mo2 F2 82.1(3) 2_565 . ?
 O8 Mo2 F8 0.0(5) 2_565 2_565 ?
 O16 Mo2 K1 131.6(3) . . ?
 O16 Mo2 K4 116.5(3) . 2_565 ?
 O16 Mo2 F2 177.7(4) . . ?
 O16 Mo2 F6 102.3(3) . . ?
 O16 Mo2 F8 99.3(4) . 2_565 ?
 O16 Mo2 F11 101.4(4) . . ?
 O16 Mo2 F12 99.0(4) . . ?
 O16 Mo2 O8 99.3(4) . 2_565 ?
 K6 Mo3 K2 65.76(4) 2_554 4_454 ?
 F13 Mo3 K2 48.7(2) 3 4_454 ?
 F13 Mo3 K2 118.3(2) . 4_454 ?
 F13 Mo3 K6 52.5(2) 3 2_554 ?
 F13 Mo3 K6 52.5(2) . 2_554 ?
 F13 Mo3 F13 89.4(5) 3 . ?
 F13 Mo3 F14 79.2(3) 3 1_545 ?
 F13 Mo3 F14 79.2(3) . 1_545 ?
 F13 Mo3 F15 87.6(3) 3 3 ?
 F13 Mo3 F15 158.9(3) . 3 ?
 F13 Mo3 F15 158.9(3) 3 . ?
 F13 Mo3 F15 87.6(3) . . ?
 F13 Mo3 O15 158.9(3) . 3 ?
 F13 Mo3 O15 87.6(3) 3 3 ?
 F14 Mo3 K2 53.76(3) 1_545 4_454 ?
 F14 Mo3 K6 43.6(2) 1_545 2_554 ?
 F15 Mo3 K2 47.1(2) 3 4_454 ?
 F15 Mo3 K2 115.8(2) . 4_454 ?
 F15 Mo3 K6 110.7(2) . 2_554 ?
 F15 Mo3 K6 110.7(2) 3 2_554 ?
 F15 Mo3 F14 79.8(2) . 1_545 ?
 F15 Mo3 F14 79.8(2) 3 1_545 ?
 F15 Mo3 F15 87.7(5) . 3 ?
 F15 Mo3 O15 87.7(5) . 3 ?
 O13 Mo3 K2 48.7(2) 3 4_454 ?
 O13 Mo3 K6 52.5(2) 3 2_554 ?
 O13 Mo3 F13 89.4(5) 3 . ?
 O13 Mo3 F13 0.0(5) 3 3 ?
 O13 Mo3 F14 79.2(3) 3 1_545 ?
 O13 Mo3 F15 158.9(3) 3 . ?
 O13 Mo3 F15 87.6(3) 3 3 ?
 O13 Mo3 O15 87.6(3) 3 3 ?
 O15 Mo3 K2 47.1(2) 3 4_454 ?
 O15 Mo3 K6 110.7(2) 3 2_554 ?
 O15 Mo3 F14 79.8(2) 3 1_545 ?
 O15 Mo3 F15 0.0(4) 3 3 ?
 O18 Mo3 K2 126.27(3) . 4_454 ?
 O18 Mo3 K6 134.9(5) . 2_554 ?
 O18 Mo3 F13 99.7(4) . . ?
 O18 Mo3 F13 99.7(4) . 3 ?
 O18 Mo3 F14 178.5(5) . 1_545 ?
 O18 Mo3 F15 101.3(4) . . ?
 O18 Mo3 F15 101.3(4) . 3 ?
 O18 Mo3 O13 99.7(4) . 3 ?
 O18 Mo3 O15 101.3(4) . 3 ?
 K2 Mo4 K2 112.60(6) 4_464 2_564 ?
 F1 Mo4 K2 118.73(18) 3 2_564 ?
 F1 Mo4 K2 48.4(2) . 2_564 ?
 F1 Mo4 K2 48.4(2) 3 4_464 ?
 F1 Mo4 K2 118.73(17) . 4_464 ?
 F1 Mo4 F1 86.9(4) . 3 ?
 F1 Mo4 F3 161.9(3) . 3 ?
 F1 Mo4 F3 87.6(3) 3 3 ?
 F1 Mo4 F3 87.6(3) . . ?
 F1 Mo4 F3 161.9(3) 3 . ?
 F1 Mo4 F14 81.7(2) . . ?
 F1 Mo4 F14 81.7(2) 3 . ?
 F1 Mo4 O1 86.9(4) . 3 ?
 F1 Mo4 O3 161.9(3) . 3 ?
 F1 Mo4 O3 87.6(3) 3 3 ?
 F3 Mo4 K2 121.2(2) 3 2_564 ?
 F3 Mo4 K2 47.04(17) . 2_564 ?
 F3 Mo4 K2 121.2(2) . 4_464 ?
 F3 Mo4 K2 47.04(17) 3 4_464 ?
 F3 Mo4 F3 92.3(4) 3 . ?
 F3 Mo4 F14 80.4(2) 3 . ?
 F3 Mo4 F14 80.4(2) . . ?
 F14 Mo4 K2 56.32(3) . 2_564 ?
 F14 Mo4 K2 56.32(3) . 4_464 ?
 O1 Mo4 K2 118.73(18) 3 2_564 ?
 O1 Mo4 K2 48.4(2) 3 4_464 ?
 O1 Mo4 F1 0.0(3) 3 3 ?
 O1 Mo4 F3 161.9(3) 3 . ?
 O1 Mo4 F3 87.6(3) 3 3 ?
 O1 Mo4 F14 81.7(2) 3 . ?
 O1 Mo4 O3 87.6(3) 3 3 ?
 O3 Mo4 K2 121.2(2) 3 2_564 ?
 O3 Mo4 K2 47.04(17) 3 4_464 ?
 O3 Mo4 F3 92.3(4) 3 . ?
 O3 Mo4 F3 0.0(4) 3 3 ?
 O3 Mo4 F14 80.4(2) 3 . ?
 O19 Mo4 K2 123.68(3) . 4_464 ?
 O19 Mo4 K2 123.68(3) . 2_564 ?
 O19 Mo4 F1 98.1(4) . . ?
 O19 Mo4 F1 98.1(4) . 3 ?
 O19 Mo4 F3 99.8(4) . . ?
 O19 Mo4 F3 99.8(4) . 3 ?
 O19 Mo4 F14 179.7(5) . . ?
 O19 Mo4 O1 98.1(4) . 3 ?
 O19 Mo4 O3 99.8(4) . 3 ?
 Br3 Br1 K3 108.2(2) . 1_565 ?
 Br3 Br1 K3 108.2(2) . 3_665 ?
 Br3 Br1 K5 97.5(3) . 2_564 ?
 K3 Br1 K3 120.7(3) 3_665 1_565 ?
 K5 Br1 K3 109.91(17) 2_564 1_565 ?
 K5 Br1 K3 109.91(17) 2_564 3_665 ?
 Br3 Br2 K3 118.02(12) . . ?
 Br3 Br2 K3 118.02(12) . 3_655 ?
 Br3 Br2 K4 64.23(13) . 3_655 ?
 Br3 Br2 K4 64.23(13) . . ?
 Br3 Br2 K6 66.63(17) . . ?
 K3 Br2 K3 106.54(17) . 3_655 ?
 K4 Br2 K3 170.67(11) 3_655 . ?
 K4 Br2 K3 170.67(11) . 3_655 ?
 K4 Br2 K3 78.67(6) 3_655 3_655 ?
 K4 Br2 K3 78.67(6) . . ?
 K4 Br2 K4 95.15(15) . 3_655 ?
 K6 Br2 K3 81.18(7) . 3_655 ?
 K6 Br2 K3 81.18(7) . . ?
 K6 Br2 K4 107.52(15) . . ?
 K6 Br2 K4 107.52(15) . 3_655 ?
 Br1 Br3 Br2 177.4(3) . . ?
 Br1 Br3 K4 106.4(3) . 3_655 ?
 Br1 Br3 K4 106.4(3) . . ?
 Br1 Br3 K6 113.5(3) . . ?
 Br2 Br3 K4 72.1(2) . 3_655 ?
 Br2 Br3 K4 72.1(2) . . ?
 Br2 Br3 K6 69.0(3) . . ?
 K4 Br3 K4 102.5(2) . 3_655 ?
 K4 Br3 K6 113.5(3) 3_655 . ?
 K4 Br3 K6 113.5(3) . . ?
 F3 K1 F6 73.28(18) . . ?
 F3 K1 F7 129.1(2) . 2_554 ?
 F3 K1 F10 136.2(2) . 2_554 ?
 F3 K1 O7 129.1(2) . 2_554 ?
 F3 K1 O10 136.2(2) . 2_554 ?
 F6 K1 F10 108.25(19) . 2_554 ?
 F6 K1 O10 108.25(19) . 2_554 ?
 F7 K1 F6 144.9(2) 2_554 . ?
 F7 K1 F10 75.2(2) 2_554 2_554 ?
 F7 K1 O10 75.2(2) 2_554 2_554 ?
 F8 K1 F3 90.6(2) . . ?
 F8 K1 F6 78.2(2) . . ?
 F8 K1 F7 75.3(2) . 2_554 ?
 F8 K1 F10 133.1(3) . 2_554 ?
 F8 K1 F15 133.1(2) . . ?
 F8 K1 O7 75.3(2) . 2_554 ?
 F8 K1 O10 133.1(3) . 2_554 ?
 F15 K1 F3 74.9(2) . . ?
 F15 K1 F6 135.0(2) . . ?
 F15 K1 F7 80.1(2) . 2_554 ?
 F15 K1 F10 75.3(2) . 2_554 ?
 F15 K1 O7 80.1(2) . 2_554 ?
 F15 K1 O10 75.3(2) . 2_554 ?
 O7 K1 F6 144.9(2) 2_554 . ?
 O7 K1 F7 0.0(4) 2_554 2_554 ?
 O7 K1 F10 75.2(2) 2_554 2_554 ?
 O7 K1 O10 75.2(2) 2_554 2_554 ?
 O10 K1 F10 0.00(14) 2_554 2_554 ?
 F3 K2 F1 55.73(17) 2_565 2_565 ?
 F3 K2 O1 55.73(17) 2_565 2_565 ?
 F6 K2 F1 71.2(2) 2_565 2_565 ?
 F6 K2 F3 72.8(2) 2_565 2_565 ?
 F6 K2 F7 129.5(2) 2_565 . ?
 F6 K2 F10 72.6(2) 2_565 . ?
 F6 K2 F12 112.8(2) 2_565 . ?
 F6 K2 O1 71.2(2) 2_565 2_565 ?
 F6 K2 O3 72.8(2) 2_565 2_565 ?
 F7 K2 F1 139.85(19) . 2_565 ?
 F7 K2 F3 152.3(2) . 2_565 ?
 F7 K2 O1 139.85(19) . 2_565 ?
 F7 K2 O3 152.3(2) . 2_565 ?
 F10 K2 F1 77.1(2) . 2_565 ?
 F10 K2 F3 128.2(2) . 2_565 ?
 F10 K2 F7 78.5(2) . . ?
 F10 K2 F12 164.9(2) . . ?
 F10 K2 O1 77.1(2) . 2_565 ?
 F10 K2 O3 128.2(2) . 2_565 ?
 F12 K2 F1 117.85(19) . 2_565 ?
 F12 K2 F3 66.4(2) . 2_565 ?
 F12 K2 F7 87.7(2) . . ?
 F12 K2 O1 117.85(19) . 2_565 ?
 F12 K2 O3 66.4(2) . 2_565 ?
 O1 K2 F1 0.0(3) 2_565 2_565 ?
 O3 K2 F1 55.73(17) 2_565 2_565 ?
 O3 K2 F3 0.0(3) 2_565 2_565 ?
 O3 K2 O1 55.73(17) 2_565 2_565 ?
 O6 K2 F1 71.2(2) 2_565 2_565 ?
 O6 K2 F3 72.8(2) 2_565 2_565 ?
 O6 K2 F6 0.0(3) 2_565 2_565 ?
 O6 K2 F7 129.5(2) 2_565 . ?
 O6 K2 F10 72.6(2) 2_565 . ?
 O6 K2 F12 112.8(2) 2_565 . ?
 O6 K2 O1 71.2(2) 2_565 2_565 ?
 O6 K2 O3 72.8(2) 2_565 2_565 ?
 F2 K3 F5 113.5(2) . 2_554 ?
 F2 K3 F7 53.89(18) . . ?
 F2 K3 F10 52.38(17) . 2_554 ?
 F2 K3 O5 113.5(2) . 2_554 ?
 F2 K3 O10 52.38(17) . 2_554 ?
 F2 K3 O17 105.7(2) . 2_554 ?
 F5 K3 F7 108.59(18) 2_554 . ?
 F10 K3 F5 65.87(18) 2_554 2_554 ?
 F10 K3 F7 55.00(19) 2_554 . ?
 F10 K3 O5 65.87(18) 2_554 2_554 ?
 F11 K3 F2 53.47(18) . . ?
 F11 K3 F5 111.1(2) . 2_554 ?
 F11 K3 F7 105.9(2) . . ?
 F11 K3 F10 90.4(2) . 2_554 ?
 F11 K3 O5 111.1(2) . 2_554 ?
 F11 K3 O10 90.4(2) . 2_554 ?
 F11 K3 O17 64.7(2) . 2_554 ?
 F13 K3 F2 90.6(2) 2 . ?
 F13 K3 F5 145.5(2) 2 2_554 ?
 F13 K3 F7 65.1(2) 2 . ?
 F13 K3 F10 120.0(2) 2 2_554 ?
 F13 K3 F11 103.0(2) 2 . ?
 F13 K3 O5 145.5(2) 2 2_554 ?
 F13 K3 O10 120.0(2) 2 2_554 ?
 F13 K3 O16 88.1(2) 2 1_545 ?
 F13 K3 O17 143.0(3) 2 2_554 ?
 O5 K3 F5 0.0(4) 2_554 2_554 ?
 O5 K3 F7 108.59(18) 2_554 . ?
 O10 K3 F5 65.87(18) 2_554 2_554 ?
 O10 K3 F7 55.00(19) 2_554 . ?
 O10 K3 F10 0.0(2) 2_554 2_554 ?
 O10 K3 O5 65.87(18) 2_554 2_554 ?
 O13 K3 F2 90.6(2) 2 . ?
 O13 K3 F5 145.5(2) 2 2_554 ?
 O13 K3 F7 65.1(2) 2 . ?
 O13 K3 F10 120.0(2) 2 2_554 ?
 O13 K3 F11 103.0(2) 2 . ?
 O13 K3 F13 0.0(4) 2 2 ?
 O13 K3 O5 145.5(2) 2 2_554 ?
 O13 K3 O10 120.0(2) 2 2_554 ?
 O13 K3 O16 88.1(2) 2 1_545 ?
 O13 K3 O17 143.0(3) 2 2_554 ?
 O16 K3 F2 111.5(2) 1_545 . ?
 O16 K3 F5 60.7(2) 1_545 2_554 ?
 O16 K3 F7 64.2(2) 1_545 . ?
 O16 K3 F10 70.2(2) 1_545 2_554 ?
 O16 K3 F11 160.6(3) 1_545 . ?
 O16 K3 O5 60.7(2) 1_545 2_554 ?
 O16 K3 O10 70.2(2) 1_545 2_554 ?
 O16 K3 O17 114.8(3) 1_545 2_554 ?
 O17 K3 F5 55.85(19) 2_554 2_554 ?
 O17 K3 F7 150.2(2) 2_554 . ?
 O17 K3 F10 95.7(2) 2_554 2_554 ?
 O17 K3 O5 55.85(19) 2_554 2_554 ?
 O17 K3 O10 95.7(2) 2_554 2_554 ?
 F1 K4 F4 100.11(18) 2_564 2_564 ?
 F1 K4 F6 68.0(2) 2_564 2_564 ?
 F1 K4 O4 100.11(18) 2_564 2_564 ?
 F1 K4 O5 152.6(2) 2_564 2_564 ?
 F1 K4 O6 68.0(2) 2_564 2_564 ?
 F4 K4 F6 75.23(19) 2_564 2_564 ?
 F4 K4 O5 53.83(17) 2_564 2_564 ?
 F4 K4 O6 75.23(19) 2_564 2_564 ?
 F6 K4 O5 94.30(19) 2_564 2_564 ?
 F8 K4 F1 114.5(2) . 2_564 ?
 F8 K4 F4 96.4(2) . 2_564 ?
 F8 K4 F6 56.17(19) . 2_564 ?
 F8 K4 O1 114.5(2) . 2_564 ?
 F8 K4 O4 96.4(2) . 2_564 ?
 F8 K4 O5 66.3(2) . 2_564 ?
 F8 K4 O6 56.17(19) . 2_564 ?
 F8 K4 O17 75.7(2) . 2_554 ?
 F11 K4 F1 132.9(2) . 2_564 ?
 F11 K4 F4 126.9(2) . 2_564 ?
 F11 K4 F6 121.9(2) . 2_564 ?
 F11 K4 F8 67.4(2) . . ?
 F11 K4 O1 132.9(2) . 2_564 ?
 F11 K4 O4 126.9(2) . 2_564 ?
 F11 K4 O5 73.93(19) . 2_564 ?
 F11 K4 O6 121.9(2) . 2_564 ?
 F11 K4 O17 69.7(2) . 2_554 ?
 O1 K4 F1 0.0(3) 2_564 2_564 ?
 O1 K4 F4 100.11(18) 2_564 2_564 ?
 O1 K4 F6 68.0(2) 2_564 2_564 ?
 O1 K4 O4 100.11(18) 2_564 2_564 ?
 O1 K4 O5 152.6(2) 2_564 2_564 ?
 O1 K4 O6 68.0(2) 2_564 2_564 ?
 O4 K4 F4 0.0(4) 2_564 2_564 ?
 O4 K4 F6 75.23(19) 2_564 2_564 ?
 O4 K4 O5 53.83(17) 2_564 2_564 ?
 O4 K4 O6 75.23(19) 2_564 2_564 ?
 O6 K4 F6 0.0(3) 2_564 2_564 ?
 O6 K4 O5 94.30(19) 2_564 2_564 ?
 O17 K4 F1 66.0(2) 2_554 2_564 ?
 O17 K4 F4 157.9(3) 2_554 2_564 ?
 O17 K4 F6 83.3(2) 2_554 2_564 ?
 O17 K4 O1 66.0(2) 2_554 2_564 ?
 O17 K4 O4 157.9(3) 2_554 2_564 ?
 O17 K4 O5 134.9(2) 2_554 2_564 ?
 O17 K4 O6 83.3(2) 2_554 2_564 ?
 F1 K5 O1 54.2(2) 3_545 1_545 ?
 F4 K5 F1 87.15(18) 3 3_545 ?
 F4 K5 F1 141.22(19) . 3_545 ?
 F4 K5 F4 131.2(3) . 3 ?
 F4 K5 F15 117.3(2) 3 . ?
 F4 K5 F15 66.59(19) 3 3 ?
 F4 K5 F15 66.59(19) . . ?
 F4 K5 F15 117.3(2) . 3 ?
 F4 K5 O1 141.22(19) . 3_545 ?
 F4 K5 O1 141.22(19) 3 1_545 ?
 F4 K5 O1 87.15(18) . 1_545 ?
 F4 K5 O1 87.15(18) 3 3_545 ?
 F4 K5 O4 131.2(3) . 3 ?
 F4 K5 O15 117.3(2) . 3 ?
 F4 K5 O15 66.59(19) 3 3 ?
 F4 K5 O19 66.07(13) 3 . ?
 F4 K5 O19 66.07(13) . . ?
 F15 K5 F1 92.8(2) . 3_545 ?
 F15 K5 F1 67.78(19) 3 3_545 ?
 F15 K5 F15 56.0(3) . 3 ?
 F15 K5 O1 92.8(2) . 3_545 ?
 F15 K5 O1 92.8(2) 3 1_545 ?
 F15 K5 O1 67.78(19) 3 3_545 ?
 F15 K5 O1 67.78(19) . 1_545 ?
 F15 K5 O15 56.0(3) . 3 ?
 F15 K5 O19 84.5(3) . . ?
 F15 K5 O19 84.5(3) 3 . ?
 O1 K5 F1 0.0(3) 3_545 3_545 ?
 O1 K5 O1 54.2(2) 3_545 1_545 ?
 O4 K5 F1 87.15(18) 3 3_545 ?
 O4 K5 F4 0.0(3) 3 3 ?
 O4 K5 F15 66.59(19) 3 3 ?
 O4 K5 F15 117.3(2) 3 . ?
 O4 K5 O1 141.22(19) 3 1_545 ?
 O4 K5 O1 87.15(18) 3 3_545 ?
 O4 K5 O15 66.59(19) 3 3 ?
 O4 K5 O19 66.07(13) 3 . ?
 O15 K5 F1 67.78(19) 3 3_545 ?
 O15 K5 F15 0.0(2) 3 3 ?
 O15 K5 O1 67.78(19) 3 3_545 ?
 O15 K5 O1 92.8(2) 3 1_545 ?
 O15 K5 O19 84.5(3) 3 . ?
 O19 K5 F1 147.7(2) . 3_545 ?
 O19 K5 O1 147.7(2) . 3_545 ?
 O19 K5 O1 147.7(2) . 1_545 ?
 F3 K6 F3 54.4(3) 4_565 2_565 ?
 F3 K6 F13 109.4(2) 4_565 2 ?
 F3 K6 F13 85.91(19) 2_565 2 ?
 F3 K6 O3 54.4(3) 4_565 2_565 ?
 F3 K6 O13 109.4(2) 4_565 2 ?
 F3 K6 O13 85.91(19) 2_565 2 ?
 F12 K6 F3 64.9(2) 3_655 4_565 ?
 F12 K6 F3 119.0(3) . 4_565 ?
 F12 K6 F3 119.0(3) 3_655 2_565 ?
 F12 K6 F3 64.9(2) . 2_565 ?
 F12 K6 F12 167.2(3) 3_655 . ?
 F12 K6 F13 109.8(2) 3_655 2 ?
 F12 K6 F13 57.5(2) . 2 ?
 F12 K6 F14 86.58(18) 3_655 2_565 ?
 F12 K6 F14 86.58(18) . 2_565 ?
 F12 K6 O3 119.0(3) . 4_565 ?
 F12 K6 O3 119.0(3) 3_655 2_565 ?
 F12 K6 O3 64.9(2) . 2_565 ?
 F12 K6 O3 64.9(2) 3_655 4_565 ?
 F12 K6 O13 109.8(2) 3_655 2 ?
 F12 K6 O13 57.5(2) . 2 ?
 F12 K6 O18 96.31(17) 3_655 2_565 ?
 F12 K6 O18 96.31(17) . 2_565 ?
 F14 K6 F3 55.17(18) 2_565 2_565 ?
 F14 K6 F3 55.17(18) 2_565 4_565 ?
 F14 K6 F13 54.21(19) 2_565 2 ?
 F14 K6 O3 55.17(18) 2_565 4_565 ?
 F14 K6 O3 55.17(18) 2_565 2_565 ?
 F14 K6 O13 54.21(19) 2_565 2 ?
 O3 K6 F3 54.4(3) 4_565 2_565 ?
 O3 K6 F3 0.0(2) 4_565 4_565 ?
 O3 K6 F3 0.0(3) 2_565 2_565 ?
 O3 K6 F13 85.91(19) 2_565 2 ?
 O3 K6 F13 109.4(2) 4_565 2 ?
 O3 K6 O3 54.4(3) 4_565 2_565 ?
 O3 K6 O13 109.4(2) 4_565 2 ?
 O3 K6 O13 85.91(19) 2_565 2 ?
 O12 K6 F3 64.9(2) 3_655 4_565 ?
 O12 K6 F3 119.0(3) 3_655 2_565 ?
 O12 K6 F12 0.0(5) 3_655 3_655 ?
 O12 K6 F12 167.2(3) 3_655 . ?
 O12 K6 F13 109.8(2) 3_655 2 ?
 O12 K6 F14 86.58(18) 3_655 2_565 ?
 O12 K6 O3 119.0(3) 3_655 2_565 ?
 O12 K6 O3 64.9(2) 3_655 4_565 ?
 O12 K6 O13 109.8(2) 3_655 2 ?
 O12 K6 O18 96.31(17) 3_655 2_565 ?
 O13 K6 F13 0.0(3) 2 2 ?
 O18 K6 F3 66.8(3) 2_565 2_565 ?
 O18 K6 F3 66.8(3) 2_565 4_565 ?
 O18 K6 F13 149.2(2) 2_565 2 ?
 O18 K6 F14 113.7(4) 2_565 2_565 ?
 O18 K6 O3 66.8(3) 2_565 4_565 ?
 O18 K6 O3 66.8(3) 2_565 2_565 ?
 O18 K6 O13 149.2(2) 2_565 2 ?
 Mo4 F1 K2 101.7(3) . 2_564 ?
 Mo4 F1 K4 105.0(2) . 2_565 ?
 Mo4 F1 K5 107.6(3) . 1_565 ?
 K2 F1 K5 111.5(2) 2_564 1_565 ?
 K4 F1 K2 109.0(2) 2_565 2_564 ?
 K4 F1 K5 120.1(2) 2_565 1_565 ?
 Mo1 F2 Mo2 160.6(3) . . ?
 Mo1 F2 K1 93.3(2) . . ?
 Mo1 F2 K3 96.8(2) . . ?
 Mo2 F2 K1 96.1(2) . . ?
 Mo2 F2 K3 99.6(2) . . ?
 K3 F2 K1 92.4(2) . . ?
 Mo4 F3 K1 140.9(3) . . ?
 Mo4 F3 K2 102.9(2) . 2_564 ?
 Mo4 F3 K6 95.6(2) . 2_564 ?
 K1 F3 K2 91.0(2) . 2_564 ?
 K1 F3 K6 120.9(2) . 2_564 ?
 K2 F3 K6 90.74(19) 2_564 2_564 ?
 Mo1 F4 K1 99.5(3) . . ?
 Mo1 F4 K4 109.6(3) . 2_565 ?
 Mo1 F4 K5 118.6(3) . . ?
 K4 F4 K1 101.2(2) 2_565 . ?
 K5 F4 K1 110.1(2) . . ?
 K5 F4 K4 115.3(2) . 2_565 ?
 Mo1 F5 K2 101.6(3) . . ?
 Mo1 F5 K3 98.3(2) . 2 ?
 Mo1 F5 K4 102.6(3) . 2_565 ?
 K2 F5 K3 107.9(2) . 2 ?
 K2 F5 K4 116.4(2) . 2_565 ?
 K3 F5 K4 125.1(2) 2 2_565 ?
 Mo2 F6 K1 107.2(3) . . ?
 Mo2 F6 K2 136.5(3) . 2_564 ?
 Mo2 F6 K4 102.5(3) . 2_565 ?
 K1 F6 K4 101.6(2) . 2_565 ?
 K2 F6 K1 92.3(2) 2_564 . ?
 K2 F6 K4 111.3(2) 2_564 2_565 ?
 Mo1 F7 K1 130.2(4) . 2 ?
 Mo1 F7 K2 108.6(3) . . ?
 Mo1 F7 K3 96.8(3) . . ?
 K1 F7 K3 125.7(3) 2 . ?
 K2 F7 K1 90.1(2) . 2 ?
 K2 F7 K3 99.7(2) . . ?
 Mo2 F8 K1 124.1(3) 2_564 . ?
 Mo2 F8 K2 96.0(3) 2_564 2_564 ?
 Mo2 F8 K4 110.2(3) 2_564 . ?
 K1 F8 K2 82.5(2) . 2_564 ?
 K1 F8 K4 121.0(3) . . ?
 K4 F8 K2 114.9(2) . 2_564 ?
 Mo1 F10 K1 101.1(2) 2 2 ?
 Mo1 F10 K2 143.0(4) 2 . ?
 Mo1 F10 K3 100.2(3) 2 2 ?
 K1 F10 K3 91.7(2) 2 2 ?
 K2 F10 K1 88.6(2) . 2 ?
 K2 F10 K3 115.3(2) . 2 ?
 Mo2 F11 K1 93.2(3) . . ?
 Mo2 F11 K3 108.6(3) . . ?
 Mo2 F11 K4 136.9(3) . . ?
 K3 F11 K1 86.93(19) . . ?
 K4 F11 K1 105.4(3) . . ?
 K4 F11 K3 110.9(2) . . ?
 Mo2 F12 K2 117.6(3) . . ?
 Mo2 F12 K3 92.7(3) . . ?
 Mo2 F12 K6 133.3(3) . . ?
 K2 F12 K3 94.31(19) . . ?
 K6 F12 K2 105.4(3) . . ?
 K6 F12 K3 101.8(2) . . ?
 Mo3 F13 K2 102.5(3) . 2_554 ?
 Mo3 F13 K3 144.4(3) . 2_554 ?
 Mo3 F13 K6 97.7(3) . 2_554 ?
 K2 F13 K6 87.53(18) 2_554 2_554 ?
 K3 F13 K2 104.1(2) 2_554 2_554 ?
 K3 F13 K6 106.7(2) 2_554 2_554 ?
 Mo3 F14 K2 91.54(13) 1_565 2_564 ?
 Mo3 F14 K2 91.54(13) 1_565 4_464 ?
 Mo3 F14 K6 101.9(3) 1_565 2_564 ?
 Mo4 F14 Mo3 158.0(4) . 1_565 ?
 Mo4 F14 K2 87.89(15) . 4_464 ?
 Mo4 F14 K2 87.89(15) . 2_564 ?
 Mo4 F14 K6 100.1(3) . 2_564 ?
 K2 F14 K2 175.2(3) 2_564 4_464 ?
 K6 F14 K2 91.46(16) 2_564 4_464 ?
 K6 F14 K2 91.46(16) 2_564 2_564 ?
 Mo3 F15 K1 129.7(3) . . ?
 Mo3 F15 K2 104.0(3) . 2_554 ?
 Mo3 F15 K5 107.2(3) . . ?
 K1 F15 K2 88.0(2) . 2_554 ?
 K1 F15 K5 113.5(2) . . ?
 K5 F15 K2 111.0(2) . 2_554 ?
 Mo2 O16 K3 159.5(5) . 1_565 ?
 Mo1 O17 K3 106.5(4) . 2 ?
 Mo1 O17 K4 143.1(5) . 2 ?
 K4 O17 K3 104.1(3) 2 2 ?
 Mo3 O18 K6 166.7(7) . 2_564 ?
 Mo4 O19 K4 99.2(3) . 4_465 ?
 Mo4 O19 K4 99.2(3) . 2_565 ?
 Mo4 O19 K5 137.2(7) . . ?
 K4 O19 K4 112.1(5) 2_565 4_465 ?
 K5 O19 K4 104.2(2) . 4_465 ?
 K5 O19 K4 104.2(2) . 2_565 ?

loop_
  _geom_torsion_atom_site_label_1
  _geom_torsion_atom_site_label_2
  _geom_torsion_atom_site_label_3
  _geom_torsion_atom_site_label_4
  _geom_torsion
  _geom_torsion_site_symmetry_1
  _geom_torsion_site_symmetry_2
  _geom_torsion_site_symmetry_3
  _geom_torsion_site_symmetry_4
  _geom_torsion_publ_flag
 K1 Mo1 F2 Mo2 119.1(11) . . . . ?
 K1 Mo1 F2 K3 -92.8(2) . . . . ?
 K1 Mo1 F4 K4 -105.5(3) . . . 2_565 ?
 K1 Mo1 F4 K5 119.2(4) . . . . ?
 K1 Mo1 F5 K2 -99.6(2) . . . . ?
 K1 Mo1 F5 K3 150.14(11) . . . 2 ?
 K1 Mo1 F5 K4 21.2(3) . . . 2_565 ?
 K1 Mo1 F7 K1 -159.1(3) . . . 2 ?
 K1 Mo1 F7 K2 94.2(3) . . . . ?
 K1 Mo1 F7 K3 -8.4(2) . . . . ?
 K1 Mo1 O17 K3 -143.32(17) . . . 2 ?
 K1 Mo1 O17 K4 71.8(8) . . . 2 ?
 K1 Mo2 F2 Mo1 -118.7(11) . . . . ?
 K1 Mo2 F2 K3 93.5(2) . . . . ?
 K1 Mo2 F6 K2 -112.7(6) . . . 2_564 ?
 K1 Mo2 F6 K4 106.5(3) . . . 2_565 ?
 K1 Mo2 F11 K3 -87.8(3) . . . . ?
 K1 Mo2 F11 K4 116.6(6) . . . . ?
 K1 Mo2 F12 K2 -78.7(4) . . . . ?
 K1 Mo2 F12 K3 17.5(3) . . . . ?
 K1 Mo2 F12 K6 126.5(4) . . . . ?
 K1 Mo2 O16 K3 43.4(16) . . . 1_565 ?
 K2 Mo3 F13 K2 -88.9(3) 4_454 . . 2_554 ?
 K2 Mo3 F13 K3 133.7(6) 4_454 . . 2_554 ?
 K2 Mo3 F13 K6 0.3(3) 4_454 . . 2_554 ?
 K2 Mo3 F15 K1 -170.5(3) 4_454 . . . ?
 K2 Mo3 F15 K2 90.3(2) 4_454 . . 2_554 ?
 K2 Mo3 F15 K5 -27.4(3) 4_454 . . . ?
 K2 Mo3 O18 K6 89.3(3) 4_454 . . 2_564 ?
 K2 Mo4 F1 K2 -95.7(2) 4_464 . . 2_564 ?
 K2 Mo4 F1 K4 150.68(13) 4_464 . . 2_565 ?
 K2 Mo4 F1 K4 -113.6(3) 2_564 . . 2_565 ?
 K2 Mo4 F1 K5 21.6(3) 4_464 . . 1_565 ?
 K2 Mo4 F1 K5 117.3(3) 2_564 . . 1_565 ?
 K2 Mo4 F3 K1 108.1(5) 2_564 . . . ?
 K2 Mo4 F3 K1 -159.0(3) 4_464 . . . ?
 K2 Mo4 F3 K2 92.8(2) 4_464 . . 2_564 ?
 K2 Mo4 F3 K6 -92.0(2) 2_564 . . 2_564 ?
 K2 Mo4 F3 K6 0.8(2) 4_464 . . 2_564 ?
 K2 Mo4 F14 Mo3 88.89(15) 4_464 . . 1_565 ?
 K2 Mo4 F14 Mo3 -88.89(15) 2_564 . . 1_565 ?
 K2 Mo4 F14 K2 177.8(3) 4_464 . . 2_564 ?
 K2 Mo4 F14 K2 -177.8(3) 2_564 . . 4_464 ?
 K2 Mo4 F14 K6 91.11(15) 2_564 . . 2_564 ?
 K2 Mo4 F14 K6 -91.11(15) 4_464 . . 2_564 ?
 K2 Mo4 O19 K4 31.5(6) 2_564 . . 2_565 ?
 K2 Mo4 O19 K4 -145.92(7) 4_464 . . 2_565 ?
 K2 Mo4 O19 K4 -31.5(6) 4_464 . . 4_465 ?
 K2 Mo4 O19 K4 145.92(7) 2_564 . . 4_465 ?
 K2 Mo4 O19 K5 91.3(3) 4_464 . . . ?
 K2 Mo4 O19 K5 -91.3(3) 2_564 . . . ?
 K3 Mo1 F2 Mo2 -24.0(12) 2 . . . ?
 K3 Mo1 F2 K1 -143.11(13) 2 . . . ?
 K3 Mo1 F2 K3 124.10(16) 2 . . . ?
 K3 Mo1 F4 K1 177.68(13) 2 . . . ?
 K3 Mo1 F4 K4 72.2(3) 2 . . 2_565 ?
 K3 Mo1 F4 K5 -63.2(3) 2 . . . ?
 K3 Mo1 F5 K2 110.3(3) 2 . . . ?
 K3 Mo1 F5 K4 -129.0(3) 2 . . 2_565 ?
 K3 Mo1 F7 K1 31.3(3) 2 . . 2 ?
 K3 Mo1 F7 K2 -75.4(3) 2 . . . ?
 K3 Mo1 F7 K3 -178.06(14) 2 . . . ?
 K3 Mo1 O17 K4 -144.9(9) 2 . . 2 ?
 K3 Br1 Br3 K4 168.27(12) 1_565 . . 3_655 ?
 K3 Br1 Br3 K4 -59.5(2) 3_665 . . 3_655 ?
 K3 Br1 Br3 K4 59.5(2) 1_565 . . . ?
 K3 Br1 Br3 K4 -168.26(12) 3_665 . . . ?
 K3 Br1 Br3 K6 -66.14(14) 1_565 . . . ?
 K3 Br1 Br3 K6 66.14(14) 3_665 . . . ?
 K3 Br2 Br3 K4 169.84(11) 3_655 . . . ?
 K3 Br2 Br3 K4 -59.73(14) . . . . ?
 K3 Br2 Br3 K4 59.73(14) 3_655 . . 3_655 ?
 K3 Br2 Br3 K4 -169.84(11) . . . 3_655 ?
 K3 Br2 Br3 K6 65.21(11) . . . . ?
 K3 Br2 Br3 K6 -65.21(11) 3_655 . . . ?
 K4 Mo2 F2 Mo1 -34.1(10) 2_565 . . . ?
 K4 Mo2 F2 K1 84.67(17) 2_565 . . . ?
 K4 Mo2 F2 K3 178.1(3) 2_565 . . . ?
 K4 Mo2 F6 K1 -106.5(3) 2_565 . . . ?
 K4 Mo2 F6 K2 140.8(6) 2_565 . . 2_564 ?
 K4 Mo2 F11 K1 3.9(3) 2_565 . . . ?
 K4 Mo2 F11 K3 -83.9(3) 2_565 . . . ?
 K4 Mo2 F11 K4 120.6(4) 2_565 . . . ?
 K4 Mo2 F12 K2 3.8(4) 2_565 . . . ?
 K4 Mo2 F12 K3 100.12(19) 2_565 . . . ?
 K4 Mo2 F12 K6 -150.9(4) 2_565 . . . ?
 K4 Mo2 O16 K3 -43.4(15) 2_565 . . 1_565 ?
 K4 Br2 Br3 K4 -110.11(14) . . . 3_655 ?
 K4 Br2 Br3 K4 110.11(14) 3_655 . . . ?
 K4 Br2 Br3 K6 124.95(7) . . . . ?
 K4 Br2 Br3 K6 -124.94(7) 3_655 . . . ?
 K5 Br1 Br3 K4 54.41(12) 2_564 . . 3_655 ?
 K5 Br1 Br3 K4 -54.41(12) 2_564 . . . ?
 K5 Br1 Br3 K6 180.0 2_564 . . . ?
 K6 Mo3 F13 K2 -89.2(2) 2_554 . . 2_554 ?
 K6 Mo3 F13 K3 133.4(8) 2_554 . . 2_554 ?
 K6 Mo3 F15 K1 117.2(3) 2_554 . . . ?
 K6 Mo3 F15 K2 18.0(3) 2_554 . . 2_554 ?
 K6 Mo3 F15 K5 -99.6(2) 2_554 . . . ?
 K6 Mo3 O18 K6 180.0 2_554 . . 2_564 ?
 K6 Br2 Br3 K4 124.94(7) . . . 3_655 ?
 K6 Br2 Br3 K4 -124.95(7) . . . . ?
 F1 Mo4 F1 K2 -133.76(16) 3 . . 2_564 ?
 F1 Mo4 F1 K4 112.64(19) 3 . . 2_565 ?
 F1 Mo4 F1 K5 -16.4(4) 3 . . 1_565 ?
 F1 Mo4 F3 K1 78.5(5) . . . . ?
 F1 Mo4 F3 K1 151.0(7) 3 . . . ?
 F1 Mo4 F3 K2 42.8(10) 3 . . 2_564 ?
 F1 Mo4 F3 K2 -29.7(3) . . . 2_564 ?
 F1 Mo4 F3 K6 -49.2(10) 3 . . 2_564 ?
 F1 Mo4 F3 K6 -121.7(2) . . . 2_564 ?
 F1 Mo4 F14 Mo3 44.0(2) 3 . . 1_565 ?
 F1 Mo4 F14 Mo3 -44.0(2) . . . 1_565 ?
 F1 Mo4 F14 K2 44.9(2) . . . 2_564 ?
 F1 Mo4 F14 K2 132.9(3) 3 . . 2_564 ?
 F1 Mo4 F14 K2 -132.9(3) . . . 4_464 ?
 F1 Mo4 F14 K2 -44.9(2) 3 . . 4_464 ?
 F1 Mo4 F14 K6 -136.0(2) 3 . . 2_564 ?
 F1 Mo4 F14 K6 136.0(2) . . . 2_564 ?
 F1 Mo4 O19 K4 101.2(3) . . . 4_465 ?
 F1 Mo4 O19 K4 13.2(4) 3 . . 4_465 ?
 F1 Mo4 O19 K4 -13.2(4) . . . 2_565 ?
 F1 Mo4 O19 K4 -101.2(3) 3 . . 2_565 ?
 F1 Mo4 O19 K5 136.0(2) 3 . . . ?
 F1 Mo4 O19 K5 -136.0(2) . . . . ?
 F1 K2 F5 Mo1 -147.6(2) 2_565 . . . ?
 F1 K2 F5 K3 -44.8(3) 2_565 . . 2 ?
 F1 K2 F5 K4 101.8(3) 2_565 . . 2_565 ?
 F1 K2 F7 Mo1 146.9(3) 2_565 . . . ?
 F1 K2 F7 K1 13.9(4) 2_565 . . 2 ?
 F1 K2 F7 K3 -112.5(3) 2_565 . . . ?
 F1 K2 F10 Mo1 -3.0(5) 2_565 . . 2 ?
 F1 K2 F10 K1 -109.9(2) 2_565 . . 2 ?
 F1 K2 F10 K3 158.9(3) 2_565 . . 2 ?
 F1 K2 F12 Mo2 -135.5(3) 2_565 . . . ?
 F1 K2 F12 K3 129.16(18) 2_565 . . . ?
 F1 K2 F12 K6 25.7(3) 2_565 . . . ?
 F1 K4 F8 Mo2 -50.8(3) 2_564 . . 2_564 ?
 F1 K4 F8 K1 105.9(3) 2_564 . . . ?
 F1 K4 F8 K2 -157.8(2) 2_564 . . 2_564 ?
 F1 K4 F11 Mo2 160.8(4) 2_564 . . . ?
 F1 K4 F11 K1 -87.0(3) 2_564 . . . ?
 F1 K4 F11 K3 5.7(5) 2_564 . . . ?
 F1 K5 F4 Mo1 -38.8(6) 3_545 . . . ?
 F1 K5 F4 K1 74.7(4) 3_545 . . . ?
 F1 K5 F4 K4 -171.7(3) 3_545 . . 2_565 ?
 F1 K5 F15 Mo3 51.2(3) 3_545 . . . ?
 F1 K5 F15 K1 -159.0(3) 3_545 . . . ?
 F1 K5 F15 K2 -61.8(2) 3_545 . . 2_554 ?
 F1 K5 O19 Mo4 -58.4(5) 3_545 . . . ?
 F1 K5 O19 K4 62.8(8) 3_545 . . 4_465 ?
 F1 K5 O19 K4 -179.5(3) 3_545 . . 2_565 ?
 F2 Mo1 F4 K1 45.4(2) . . . . ?
 F2 Mo1 F4 K4 -60.1(3) . . . 2_565 ?
 F2 Mo1 F4 K5 164.6(4) . . . . ?
 F2 Mo1 F5 K2 -60.1(3) . . . . ?
 F2 Mo1 F5 K3 -170.4(3) . . . 2 ?
 F2 Mo1 F5 K4 60.7(3) . . . 2_565 ?
 F2 Mo1 F7 K1 165.7(4) . . . 2 ?
 F2 Mo1 F7 K2 59.1(3) . . . . ?
 F2 Mo1 F7 K3 -43.6(2) . . . . ?
 F2 Mo2 F6 K1 -39.8(3) . . . . ?
 F2 Mo2 F6 K2 -152.5(5) . . . 2_564 ?
 F2 Mo2 F6 K4 66.7(2) . . . 2_565 ?
 F2 Mo2 F11 K1 49.2(2) . . . . ?
 F2 Mo2 F11 K3 -38.7(3) . . . . ?
 F2 Mo2 F11 K4 165.8(6) . . . . ?
 F2 Mo2 F12 K2 -51.4(3) . . . . ?
 F2 Mo2 F12 K3 44.9(2) . . . . ?
 F2 Mo2 F12 K6 153.9(6) . . . . ?
 F2 K3 F7 Mo1 39.7(2) . . . . ?
 F2 K3 F7 K1 -167.7(4) . . . 2 ?
 F2 K3 F7 K2 -70.5(2) . . . . ?
 F2 K3 F11 Mo2 35.4(3) . . . . ?
 F2 K3 F11 K1 -56.9(2) . . . . ?
 F2 K3 F11 K4 -162.2(4) . . . . ?
 F2 K3 F12 Mo2 -43.6(2) . . . . ?
 F2 K3 F12 K2 74.4(2) . . . . ?
 F2 K3 F12 K6 -178.9(4) . . . . ?
 F3 Mo4 F1 K2 29.0(2) . . . 2_564 ?
 F3 Mo4 F1 K2 -61.2(10) 3 . . 2_564 ?
 F3 Mo4 F1 K4 -84.6(3) . . . 2_565 ?
 F3 Mo4 F1 K4 -174.8(8) 3 . . 2_565 ?
 F3 Mo4 F1 K5 56.2(10) 3 . . 1_565 ?
 F3 Mo4 F1 K5 146.3(3) . . . 1_565 ?
 F3 Mo4 F3 K1 -119.7(4) 3 . . . ?
 F3 Mo4 F3 K2 132.19(15) 3 . . 2_564 ?
 F3 Mo4 F3 K6 40.1(3) 3 . . 2_564 ?
 F3 Mo4 F14 Mo3 133.00(19) 3 . . 1_565 ?
 F3 Mo4 F14 Mo3 -133.00(19) . . . 1_565 ?
 F3 Mo4 F14 K2 44.1(2) 3 . . 4_464 ?
 F3 Mo4 F14 K2 -138.1(3) 3 . . 2_564 ?
 F3 Mo4 F14 K2 -44.1(2) . . . 2_564 ?
 F3 Mo4 F14 K2 138.1(3) . . . 4_464 ?
 F3 Mo4 F14 K6 47.00(19) . . . 2_564 ?
 F3 Mo4 F14 K6 -47.00(19) 3 . . 2_564 ?
 F3 Mo4 O19 K4 169.8(3) 3 . . 2_565 ?
 F3 Mo4 O19 K4 -169.8(3) . . . 4_465 ?
 F3 Mo4 O19 K4 75.8(4) . . . 2_565 ?
 F3 Mo4 O19 K4 -75.8(4) 3 . . 4_465 ?
 F3 Mo4 O19 K5 47.0(2) 3 . . . ?
 F3 Mo4 O19 K5 -47.0(2) . . . . ?
 F3 K1 F2 Mo1 92.6(2) . . . . ?
 F3 K1 F2 Mo2 -70.5(3) . . . . ?
 F3 K1 F2 K3 -170.45(19) . . . . ?
 F3 K1 F4 Mo1 -170.6(3) . . . . ?
 F3 K1 F4 K4 -58.4(2) . . . 2_565 ?
 F3 K1 F4 K5 64.1(2) . . . . ?
 F3 K1 F6 Mo2 177.7(4) . . . . ?
 F3 K1 F6 K2 -41.8(2) . . . 2_564 ?
 F3 K1 F6 K4 70.5(2) . . . 2_565 ?
 F3 K1 F8 Mo2 -59.6(4) . . . 2_564 ?
 F3 K1 F8 K2 32.53(18) . . . 2_564 ?
 F3 K1 F8 K4 147.1(3) . . . . ?
 F3 K1 F11 Mo2 53.1(3) . . . . ?
 F3 K1 F11 K3 161.6(2) . . . . ?
 F3 K1 F11 K4 -87.6(3) . . . . ?
 F3 K1 F15 Mo3 65.1(4) . . . . ?
 F3 K1 F15 K2 171.7(2) . . . 2_554 ?
 F3 K1 F15 K5 -76.2(3) . . . . ?
 F3 K2 F5 Mo1 128.0(3) 2_565 . . . ?
 F3 K2 F5 K3 -129.2(3) 2_565 . . 2 ?
 F3 K2 F5 K4 17.4(4) 2_565 . . 2_565 ?
 F3 K2 F7 Mo1 -100.9(5) 2_565 . . . ?
 F3 K2 F7 K1 126.1(4) 2_565 . . 2 ?
 F3 K2 F7 K3 -0.3(6) 2_565 . . . ?
 F3 K2 F10 Mo1 -26.8(7) 2_565 . . 2 ?
 F3 K2 F10 K1 -133.7(2) 2_565 . . 2 ?
 F3 K2 F10 K3 135.1(2) 2_565 . . 2 ?
 F3 K2 F12 Mo2 -113.3(4) 2_565 . . . ?
 F3 K2 F12 K3 151.4(2) 2_565 . . . ?
 F3 K2 F12 K6 47.9(2) 2_565 . . . ?
 F3 K6 F12 Mo2 112.8(5) 2_565 . . . ?
 F3 K6 F12 Mo2 119.1(5) 4_565 . . . ?
 F3 K6 F12 K2 -44.1(2) 2_565 . . . ?
 F3 K6 F12 K2 -37.9(3) 4_565 . . . ?
 F3 K6 F12 K3 -142.0(2) 2_565 . . . ?
 F3 K6 F12 K3 -135.73(19) 4_565 . . . ?
 F4 Mo1 F2 Mo2 75.0(11) . . . . ?
 F4 Mo1 F2 K1 -44.1(2) . . . . ?
 F4 Mo1 F2 K3 -136.9(3) . . . . ?
 F4 Mo1 F5 K2 -141.2(3) . . . . ?
 F4 Mo1 F5 K3 108.5(3) . . . 2 ?
 F4 Mo1 F5 K4 -20.5(3) . . . 2_565 ?
 F4 Mo1 F7 K1 153.2(7) . . . 2 ?
 F4 Mo1 F7 K2 46.5(11) . . . . ?
 F4 Mo1 F7 K3 -56.1(9) . . . . ?
 F4 Mo1 O17 K3 -98.6(3) . . . 2 ?
 F4 Mo1 O17 K4 116.5(7) . . . 2 ?
 F4 K4 F8 Mo2 53.4(3) 2_564 . . 2_564 ?
 F4 K4 F8 K1 -149.9(3) 2_564 . . . ?
 F4 K4 F8 K2 -53.6(3) 2_564 . . 2_564 ?
 F4 K4 F11 Mo2 -15.4(7) 2_564 . . . ?
 F4 K4 F11 K1 96.9(3) 2_564 . . . ?
 F4 K4 F11 K3 -170.5(2) 2_564 . . . ?
 F4 K5 F4 Mo1 151.6(2) 3 . . . ?
 F4 K5 F4 K1 -94.9(4) 3 . . . ?
 F4 K5 F4 K4 18.7(6) 3 . . 2_565 ?
 F4 K5 F15 Mo3 -37.1(3) 3 . . . ?
 F4 K5 F15 Mo3 -162.8(3) . . . . ?
 F4 K5 F15 K1 -13.0(2) . . . . ?
 F4 K5 F15 K1 112.7(3) 3 . . . ?
 F4 K5 F15 K2 84.2(2) . . . 2_554 ?
 F4 K5 F15 K2 -150.1(2) 3 . . 2_554 ?
 F4 K5 O19 Mo4 95.0(2) . . . . ?
 F4 K5 O19 Mo4 -95.0(2) 3 . . . ?
 F4 K5 O19 K4 -143.9(5) . . . 4_465 ?
 F4 K5 O19 K4 143.9(5) 3 . . 2_565 ?
 F4 K5 O19 K4 26.2(2) 3 . . 4_465 ?
 F4 K5 O19 K4 -26.2(2) . . . 2_565 ?
 F5 Mo1 F2 Mo2 -13.7(11) . . . . ?
 F5 Mo1 F2 K1 -132.8(2) . . . . ?
 F5 Mo1 F2 K3 134.4(3) . . . . ?
 F5 Mo1 F4 K1 128.4(3) . . . . ?
 F5 Mo1 F4 K4 22.8(3) . . . 2_565 ?
 F5 Mo1 F4 K5 -112.5(4) . . . . ?
 F5 Mo1 F7 K1 82.6(4) . . . 2 ?
 F5 Mo1 F7 K2 -24.0(3) . . . . ?
 F5 Mo1 F7 K3 -126.7(2) . . . . ?
 F5 Mo1 O17 K3 -9.8(4) . . . 2 ?
 F5 Mo1 O17 K4 -154.6(7) . . . 2 ?
 F5 K3 F2 Mo1 61.7(3) 2_554 . . . ?
 F5 K3 F2 Mo2 -128.5(2) 2_554 . . . ?
 F5 K3 F2 K1 -31.9(2) 2_554 . . . ?
 F5 K3 F7 Mo1 -66.3(2) 2_554 . . . ?
 F5 K3 F7 K1 86.3(3) 2_554 . . 2 ?
 F5 K3 F7 K2 -176.56(19) 2_554 . . . ?
 F5 K3 F11 Mo2 139.7(3) 2_554 . . . ?
 F5 K3 F11 K1 47.4(2) 2_554 . . . ?
 F5 K3 F11 K4 -57.9(3) 2_554 . . . ?
 F5 K3 F12 Mo2 -4.6(7) 2_554 . . . ?
 F5 K3 F12 K2 113.4(6) 2_554 . . . ?
 F5 K3 F12 K6 -140.0(5) 2_554 . . . ?
 F6 Mo2 F2 Mo1 -82.7(11) . . . . ?
 F6 Mo2 F2 K1 36.0(3) . . . . ?
 F6 Mo2 F2 K3 129.5(3) . . . . ?
 F6 Mo2 F11 K1 -29.9(2) . . . . ?
 F6 Mo2 F11 K3 -117.7(3) . . . . ?
 F6 Mo2 F11 K4 86.8(5) . . . . ?
 F6 Mo2 F12 K2 -39.5(10) . . . . ?
 F6 Mo2 F12 K3 56.8(9) . . . . ?
 F6 Mo2 F12 K6 165.7(6) . . . . ?
 F6 Mo2 O16 K3 5.7(15) . . . 1_565 ?
 F6 K1 F2 Mo1 133.8(3) . . . . ?
 F6 K1 F2 Mo2 -29.3(2) . . . . ?
 F6 K1 F2 K3 -129.2(3) . . . . ?
 F6 K1 F3 Mo4 -73.1(5) . . . . ?
 F6 K1 F3 K2 39.00(19) . . . 2_564 ?
 F6 K1 F3 K6 130.5(3) . . . 2_564 ?
 F6 K1 F4 Mo1 -96.3(3) . . . . ?
 F6 K1 F4 K4 16.0(2) . . . 2_565 ?
 F6 K1 F4 K5 138.4(2) . . . . ?
 F6 K1 F8 Mo2 -132.4(4) . . . 2_564 ?
 F6 K1 F8 K2 -40.26(17) . . . 2_564 ?
 F6 K1 F8 K4 74.3(3) . . . . ?
 F6 K1 F11 Mo2 25.5(2) . . . . ?
 F6 K1 F11 K3 134.0(3) . . . . ?
 F6 K1 F11 K4 -115.1(3) . . . . ?
 F6 K1 F15 Mo3 111.5(4) . . . . ?
 F6 K1 F15 K2 -141.9(2) . . . 2_554 ?
 F6 K1 F15 K5 -29.9(4) . . . . ?
 F6 K2 F5 Mo1 176.2(3) 2_565 . . . ?
 F6 K2 F5 K3 -80.9(2) 2_565 . . 2 ?
 F6 K2 F5 K4 65.7(3) 2_565 . . 2_565 ?
 F6 K2 F7 Mo1 37.5(5) 2_565 . . . ?
 F6 K2 F7 K1 -95.5(3) 2_565 . . 2 ?
 F6 K2 F7 K3 138.2(2) 2_565 . . . ?
 F6 K2 F10 Mo1 -77.1(6) 2_565 . . 2 ?
 F6 K2 F10 K1 176.1(2) 2_565 . . 2 ?
 F6 K2 F10 K3 84.9(3) 2_565 . . 2 ?
 F6 K2 F12 Mo2 -55.5(4) 2_565 . . . ?
 F6 K2 F12 K3 -150.8(2) 2_565 . . . ?
 F6 K2 F12 K6 105.7(3) 2_565 . . . ?
 F6 K4 F8 Mo2 -14.0(2) 2_564 . . 2_564 ?
 F6 K4 F8 K1 142.6(4) 2_564 . . . ?
 F6 K4 F8 K2 -121.0(3) 2_564 . . 2_564 ?
 F6 K4 F11 Mo2 -110.6(5) 2_564 . . . ?
 F6 K4 F11 K1 1.6(3) 2_564 . . . ?
 F6 K4 F11 K3 94.2(3) 2_564 . . . ?
 F7 Mo1 F2 Mo2 -101.0(11) . . . . ?
 F7 Mo1 F2 K1 139.8(3) . . . . ?
 F7 Mo1 F2 K3 47.0(3) . . . . ?
 F7 Mo1 F4 K1 58.0(10) . . . . ?
 F7 Mo1 F4 K4 -47.5(10) . . . 2_565 ?
 F7 Mo1 F4 K5 177.2(8) . . . . ?
 F7 Mo1 F5 K2 21.6(3) . . . . ?
 F7 Mo1 F5 K3 -88.7(3) . . . 2 ?
 F7 Mo1 F5 K4 142.3(3) . . . 2_565 ?
 F7 Mo1 O17 K3 77.7(4) . . . 2 ?
 F7 Mo1 O17 K4 -67.2(7) . . . 2 ?
 F7 K1 F2 Mo1 -84.5(2) 2_554 . . . ?
 F7 K1 F2 Mo2 112.5(2) 2_554 . . . ?
 F7 K1 F2 K3 12.5(2) 2_554 . . . ?
 F7 K1 F3 Mo4 138.0(4) 2_554 . . . ?
 F7 K1 F3 K2 -109.9(2) 2_554 . . 2_564 ?
 F7 K1 F3 K6 -18.4(4) 2_554 . . 2_564 ?
 F7 K1 F4 Mo1 55.2(4) 2_554 . . . ?
 F7 K1 F4 K4 167.5(2) 2_554 . . 2_565 ?
 F7 K1 F4 K5 -70.1(3) 2_554 . . . ?
 F7 K1 F6 Mo2 -46.4(5) 2_554 . . . ?
 F7 K1 F6 K2 94.1(4) 2_554 . . 2_564 ?
 F7 K1 F6 K4 -153.5(3) 2_554 . . 2_565 ?
 F7 K1 F8 Mo2 70.9(4) 2_554 . . 2_564 ?
 F7 K1 F8 K2 163.1(2) 2_554 . . 2_564 ?
 F7 K1 F8 K4 -82.4(4) 2_554 . . . ?
 F7 K1 F11 Mo2 -165.9(3) 2_554 . . . ?
 F7 K1 F11 K3 -57.4(2) 2_554 . . . ?
 F7 K1 F11 K4 53.5(2) 2_554 . . . ?
 F7 K1 F15 Mo3 -70.1(4) 2_554 . . . ?
 F7 K1 F15 K2 36.44(19) 2_554 . . 2_554 ?
 F7 K1 F15 K5 148.5(3) 2_554 . . . ?
 F7 K2 F5 Mo1 -18.4(3) . . . . ?
 F7 K2 F5 K3 84.4(3) . . . 2 ?
 F7 K2 F5 K4 -129.0(3) . . . 2_565 ?
 F7 K2 F10 Mo1 144.8(6) . . . 2 ?
 F7 K2 F10 K1 38.0(2) . . . 2 ?
 F7 K2 F10 K3 -53.2(3) . . . 2 ?
 F7 K2 F12 Mo2 76.9(4) . . . . ?
 F7 K2 F12 K3 -18.4(2) . . . . ?
 F7 K2 F12 K6 -121.9(3) . . . . ?
 F7 K3 F2 Mo1 -34.77(19) . . . . ?
 F7 K3 F2 Mo2 135.0(3) . . . . ?
 F7 K3 F2 K1 -128.4(2) . . . . ?
 F7 K3 F11 Mo2 22.0(4) . . . . ?
 F7 K3 F11 K1 -70.3(2) . . . . ?
 F7 K3 F11 K4 -175.6(2) . . . . ?
 F7 K3 F12 Mo2 -100.8(3) . . . . ?
 F7 K3 F12 K2 17.13(18) . . . . ?
 F7 K3 F12 K6 123.8(3) . . . . ?
 F8 Mo2 F2 Mo1 5.9(11) 2_565 . . . ?
 F8 Mo2 F2 K1 124.7(3) 2_565 . . . ?
 F8 Mo2 F2 K3 -141.9(3) 2_565 . . . ?
 F8 Mo2 F6 K1 -122.3(3) 2_565 . . . ?
 F8 Mo2 F6 K2 125.0(5) 2_565 . . 2_564 ?
 F8 Mo2 F6 K4 -15.8(2) 2_565 . . 2_565 ?
 F8 Mo2 F11 K1 53.9(10) 2_565 . . . ?
 F8 Mo2 F11 K3 -33.9(11) 2_565 . . . ?
 F8 Mo2 F11 K4 170.6(8) 2_565 . . . ?
 F8 Mo2 F12 K2 31.4(3) 2_565 . . . ?
 F8 Mo2 F12 K3 127.7(2) 2_565 . . . ?
 F8 Mo2 F12 K6 -123.3(5) 2_565 . . . ?
 F8 Mo2 O16 K3 -83.5(14) 2_565 . . 1_565 ?
 F8 K1 F2 Mo1 -166.3(2) . . . . ?
 F8 K1 F2 Mo2 30.7(3) . . . . ?
 F8 K1 F2 K3 -69.3(2) . . . . ?
 F8 K1 F3 Mo4 -150.6(5) . . . . ?
 F8 K1 F3 K2 -38.5(2) . . . 2_564 ?
 F8 K1 F3 K6 53.0(3) . . . 2_564 ?
 F8 K1 F4 Mo1 -95.5(6) . . . . ?
 F8 K1 F4 K4 16.8(6) . . . 2_565 ?
 F8 K1 F4 K5 139.2(5) . . . . ?
 F8 K1 F6 Mo2 -88.1(3) . . . . ?
 F8 K1 F6 K2 52.4(2) . . . 2_564 ?
 F8 K1 F6 K4 164.7(3) . . . 2_565 ?
 F8 K1 F11 Mo2 122.7(3) . . . . ?
 F8 K1 F11 K3 -128.8(3) . . . . ?
 F8 K1 F11 K4 -17.9(2) . . . . ?
 F8 K1 F15 Mo3 -11.1(6) . . . . ?
 F8 K1 F15 K2 95.5(3) . . . 2_554 ?
 F8 K1 F15 K5 -152.5(3) . . . . ?
 F8 K4 F11 Mo2 -96.1(6) . . . . ?
 F8 K4 F11 K1 16.09(19) . . . . ?
 F8 K4 F11 K3 108.7(3) . . . . ?
 F10 Mo1 F2 Mo2 165.1(11) 2_554 . . . ?
 F10 Mo1 F2 K1 45.9(2) 2_554 . . . ?
 F10 Mo1 F2 K3 -46.9(3) 2_554 . . . ?
 F10 Mo1 F4 K1 -32.4(3) 2_554 . . . ?
 F10 Mo1 F4 K4 -137.9(3) 2_554 . . 2_565 ?
 F10 Mo1 F4 K5 86.8(3) 2_554 . . . ?
 F10 Mo1 F5 K2 -63.7(9) 2_554 . . . ?
 F10 Mo1 F5 K3 -174.0(8) 2_554 . . 2 ?
 F10 Mo1 F5 K4 57.0(9) 2_554 . . 2_565 ?
 F10 Mo1 F7 K1 -117.1(4) 2_554 . . 2 ?
 F10 Mo1 F7 K2 136.3(3) 2_554 . . . ?
 F10 Mo1 F7 K3 33.6(2) 2_554 . . . ?
 F10 Mo1 O17 K3 171.4(3) 2_554 . . 2 ?
 F10 Mo1 O17 K4 26.5(8) 2_554 . . 2 ?
 F10 K1 F2 Mo1 -36.3(2) 2_554 . . . ?
 F10 K1 F2 Mo2 160.7(3) 2_554 . . . ?
 F10 K1 F2 K3 60.7(2) 2_554 . . . ?
 F10 K1 F3 Mo4 26.0(6) 2_554 . . . ?
 F10 K1 F3 K2 138.2(2) 2_554 . . 2_564 ?
 F10 K1 F3 K6 -130.4(3) 2_554 . . 2_564 ?
 F10 K1 F4 Mo1 25.8(2) 2_554 . . . ?
 F10 K1 F4 K4 138.0(3) 2_554 . . 2_565 ?
 F10 K1 F4 K5 -99.5(3) 2_554 . . . ?
 F10 K1 F6 Mo2 43.6(4) 2_554 . . . ?
 F10 K1 F6 K2 -175.82(17) 2_554 . . 2_564 ?
 F10 K1 F6 K4 -63.5(3) 2_554 . . 2_565 ?
 F10 K1 F8 Mo2 123.5(4) 2_554 . . 2_564 ?
 F10 K1 F8 K2 -144.3(2) 2_554 . . 2_564 ?
 F10 K1 F8 K4 -29.7(5) 2_554 . . . ?
 F10 K1 F11 Mo2 -90.9(2) 2_554 . . . ?
 F10 K1 F11 K3 17.6(2) 2_554 . . . ?
 F10 K1 F11 K4 128.4(2) 2_554 . . . ?
 F10 K1 F15 Mo3 -147.3(5) 2_554 . . . ?
 F10 K1 F15 K2 -40.70(17) 2_554 . . 2_554 ?
 F10 K1 F15 K5 71.4(3) 2_554 . . . ?
 F10 K2 F5 Mo1 -107.3(3) . . . . ?
 F10 K2 F5 K3 -4.5(2) . . . 2 ?
 F10 K2 F5 K4 142.1(3) . . . 2_565 ?
 F10 K2 F7 Mo1 93.3(4) . . . . ?
 F10 K2 F7 K1 -39.7(2) . . . 2 ?
 F10 K2 F7 K3 -166.1(2) . . . . ?
 F10 K2 F12 Mo2 52.8(10) . . . . ?
 F10 K2 F12 K3 -42.5(9) . . . . ?
 F10 K2 F12 K6 -146.0(7) . . . . ?
 F10 K3 F2 Mo1 35.7(2) 2_554 . . . ?
 F10 K3 F2 Mo2 -154.5(4) 2_554 . . . ?
 F10 K3 F2 K1 -57.9(2) 2_554 . . . ?
 F10 K3 F7 Mo1 -25.97(17) 2_554 . . . ?
 F10 K3 F7 K1 126.6(3) 2_554 . . 2 ?
 F10 K3 F7 K2 -136.2(3) 2_554 . . . ?
 F10 K3 F11 Mo2 75.5(3) 2_554 . . . ?
 F10 K3 F11 K1 -16.78(19) 2_554 . . . ?
 F10 K3 F11 K4 -122.1(3) 2_554 . . . ?
 F10 K3 F12 Mo2 -53.7(3) 2_554 . . . ?
 F10 K3 F12 K2 64.2(2) 2_554 . . . ?
 F10 K3 F12 K6 170.9(2) 2_554 . . . ?
 F11 Mo2 F2 Mo1 -175.8(11) . . . . ?
 F11 Mo2 F2 K1 -57.0(3) . . . . ?
 F11 Mo2 F2 K3 36.4(3) . . . . ?
 F11 Mo2 F6 K1 37.0(3) . . . . ?
 F11 Mo2 F6 K2 -75.7(5) . . . 2_564 ?
 F11 Mo2 F6 K4 143.5(3) . . . 2_565 ?
 F11 Mo2 F12 K2 -128.5(4) . . . . ?
 F11 Mo2 F12 K3 -32.2(3) . . . . ?
 F11 Mo2 F12 K6 76.8(5) . . . . ?
 F11 Mo2 O16 K3 98.9(14) . . . 1_565 ?
 F11 K3 F2 Mo1 161.3(4) . . . . ?
 F11 K3 F2 Mo2 -29.0(2) . . . . ?
 F11 K3 F2 K1 67.6(2) . . . . ?
 F11 K3 F7 Mo1 53.1(3) . . . . ?
 F11 K3 F7 K1 -154.4(3) . . . 2 ?
 F11 K3 F7 K2 -57.2(3) . . . . ?
 F11 K3 F12 Mo2 27.2(2) . . . . ?
 F11 K3 F12 K2 145.2(3) . . . . ?
 F11 K3 F12 K6 -108.2(3) . . . . ?
 F11 K4 F8 Mo2 -179.2(4) . . . 2_564 ?
 F11 K4 F8 K1 -22.6(3) . . . . ?
 F11 K4 F8 K2 73.8(3) . . . 2_564 ?
 F12 Mo2 F2 Mo1 92.8(11) . . . . ?
 F12 Mo2 F2 K1 -148.4(3) . . . . ?
 F12 Mo2 F2 K3 -55.0(3) . . . . ?
 F12 Mo2 F6 K1 -51.7(9) . . . . ?
 F12 Mo2 F6 K2 -164.4(7) . . . 2_564 ?
 F12 Mo2 F6 K4 54.9(9) . . . 2_565 ?
 F12 Mo2 F11 K1 128.4(2) . . . . ?
 F12 Mo2 F11 K3 40.6(3) . . . . ?
 F12 Mo2 F11 K4 -115.0(5) . . . . ?
 F12 Mo2 O16 K3 -170.4(14) . . . 1_565 ?
 F12 K2 F5 Mo1 64.4(3) . . . . ?
 F12 K2 F5 K3 167.2(2) . . . 2 ?
 F12 K2 F5 K4 -46.2(3) . . . 2_565 ?
 F12 K2 F7 Mo1 -80.5(3) . . . . ?
 F12 K2 F7 K1 146.5(2) . . . 2 ?
 F12 K2 F7 K3 20.2(2) . . . . ?
 F12 K2 F10 Mo1 169.5(6) . . . 2 ?
 F12 K2 F10 K1 62.6(9) . . . 2 ?
 F12 K2 F10 K3 -28.6(10) . . . 2 ?
 F12 K6 F12 Mo2 -136.7(14) 3_655 . . . ?
 F12 K6 F12 K2 66.4(19) 3_655 . . . ?
 F12 K6 F12 K3 -31.4(19) 3_655 . . . ?
 F13 Mo3 F13 K2 -129.8(2) 3 . . 2_554 ?
 F13 Mo3 F13 K3 92.7(6) 3 . . 2_554 ?
 F13 Mo3 F13 K6 -40.6(4) 3 . . 2_554 ?
 F13 Mo3 F15 K1 69.0(4) . . . . ?
 F13 Mo3 F15 K1 151.2(8) 3 . . . ?
 F13 Mo3 F15 K2 51.9(11) 3 . . 2_554 ?
 F13 Mo3 F15 K2 -30.2(3) . . . 2_554 ?
 F13 Mo3 F15 K5 -147.8(3) . . . . ?
 F13 Mo3 F15 K5 -65.7(10) 3 . . . ?
 F13 Mo3 O18 K6 134.5(3) 3 . . 2_564 ?
 F13 Mo3 O18 K6 -134.5(3) . . . 2_564 ?
 F13 K3 F2 Mo1 -92.9(3) 2 . . . ?
 F13 K3 F2 Mo2 76.9(3) 2 . . . ?
 F13 K3 F2 K1 173.5(2) 2 . . . ?
 F13 K3 F7 Mo1 150.4(3) 2 . . . ?
 F13 K3 F7 K1 -57.1(3) 2 . . 2 ?
 F13 K3 F7 K2 40.1(2) 2 . . . ?
 F13 K3 F11 Mo2 -45.4(4) 2 . . . ?
 F13 K3 F11 K1 -137.7(2) 2 . . . ?
 F13 K3 F11 K4 116.9(3) 2 . . . ?
 F13 K3 F12 Mo2 -172.4(4) 2 . . . ?
 F13 K3 F12 K2 -54.5(3) 2 . . . ?
 F13 K3 F12 K6 52.2(3) 2 . . . ?
 F13 K6 F12 Mo2 -145.4(6) 2 . . . ?
 F13 K6 F12 K2 57.7(2) 2 . . . ?
 F13 K6 F12 K3 -40.2(2) 2 . . . ?
 F14 Mo3 F13 K2 -50.7(2) 1_545 . . 2_554 ?
 F14 Mo3 F13 K3 171.8(7) 1_545 . . 2_554 ?
 F14 Mo3 F13 K6 38.5(2) 1_545 . . 2_554 ?
 F14 Mo3 F15 K1 148.5(5) 1_545 . . . ?
 F14 Mo3 F15 K2 49.3(2) 1_545 . . 2_554 ?
 F14 Mo3 F15 K5 -68.4(2) 1_545 . . . ?
 F14 Mo4 F1 K2 -51.7(2) . . . 2_564 ?
 F14 Mo4 F1 K4 -165.3(3) . . . 2_565 ?
 F14 Mo4 F1 K5 65.6(3) . . . 1_565 ?
 F14 Mo4 F3 K1 160.5(5) . . . . ?
 F14 Mo4 F3 K2 52.3(2) . . . 2_564 ?
 F14 Mo4 F3 K6 -39.7(2) . . . 2_564 ?
 F14 K6 F12 Mo2 165.7(5) 2_565 . . . ?
 F14 K6 F12 K2 8.7(3) 2_565 . . . ?
 F14 K6 F12 K3 -89.1(2) 2_565 . . . ?
 F15 Mo3 F13 K2 29.3(3) . . . 2_554 ?
 F15 Mo3 F13 K2 -48.0(11) 3 . . 2_554 ?
 F15 Mo3 F13 K3 174.5(7) 3 . . 2_554 ?
 F15 Mo3 F13 K3 -108.1(7) . . . 2_554 ?
 F15 Mo3 F13 K6 118.5(3) . . . 2_554 ?
 F15 Mo3 F13 K6 41.2(11) 3 . . 2_554 ?
 F15 Mo3 F15 K1 -131.5(3) 3 . . . ?
 F15 Mo3 F15 K2 129.27(19) 3 . . 2_554 ?
 F15 Mo3 F15 K5 11.7(4) 3 . . . ?
 F15 Mo3 O18 K6 -44.9(2) . . . 2_564 ?
 F15 Mo3 O18 K6 44.9(2) 3 . . 2_564 ?
 F15 K1 F2 Mo1 6.1(3) . . . . ?
 F15 K1 F2 Mo2 -157.0(2) . . . . ?
 F15 K1 F2 K3 103.1(2) . . . . ?
 F15 K1 F3 Mo4 74.6(5) . . . . ?
 F15 K1 F3 K2 -173.3(2) . . . 2_564 ?
 F15 K1 F3 K6 -81.8(3) . . . 2_564 ?
 F15 K1 F4 Mo1 112.8(3) . . . . ?
 F15 K1 F4 K4 -135.0(2) . . . 2_565 ?
 F15 K1 F4 K5 -12.5(2) . . . . ?
 F15 K1 F6 Mo2 130.8(3) . . . . ?
 F15 K1 F6 K2 -88.6(3) . . . 2_564 ?
 F15 K1 F6 K4 23.7(4) . . . 2_565 ?
 F15 K1 F8 Mo2 10.1(6) . . . 2_564 ?
 F15 K1 F8 K2 102.2(3) . . . 2_564 ?
 F15 K1 F8 K4 -143.2(3) . . . . ?
 F15 K1 F11 Mo2 -98.6(6) . . . . ?
 F15 K1 F11 K3 9.9(7) . . . . ?
 F15 K1 F11 K4 120.7(6) . . . . ?
 F15 K5 F4 Mo1 -126.6(3) 3 . . . ?
 F15 K5 F4 Mo1 -101.9(3) . . . . ?
 F15 K5 F4 K1 11.6(2) . . . . ?
 F15 K5 F4 K1 -13.1(3) 3 . . . ?
 F15 K5 F4 K4 125.3(3) . . . 2_565 ?
 F15 K5 F4 K4 100.5(3) 3 . . 2_565 ?
 F15 K5 F15 Mo3 -9.5(3) 3 . . . ?
 F15 K5 F15 K1 140.32(18) 3 . . . ?
 F15 K5 F15 K2 -122.45(16) 3 . . 2_554 ?
 F15 K5 O19 Mo4 -28.16(14) 3 . . . ?
 F15 K5 O19 Mo4 28.16(14) . . . . ?
 F15 K5 O19 K4 -93.0(3) . . . 2_565 ?
 F15 K5 O19 K4 149.3(4) . . . 4_465 ?
 F15 K5 O19 K4 93.0(3) 3 . . 4_465 ?
 F15 K5 O19 K4 -149.3(4) 3 . . 2_565 ?
 O1 Mo4 F1 K2 -133.76(16) 3 . . 2_564 ?
 O1 Mo4 F1 K4 112.64(19) 3 . . 2_565 ?
 O1 Mo4 F1 K5 -16.4(4) 3 . . 1_565 ?
 O1 Mo4 F3 K1 151.0(7) 3 . . . ?
 O1 Mo4 F3 K2 42.8(10) 3 . . 2_564 ?
 O1 Mo4 F3 K6 -49.2(10) 3 . . 2_564 ?
 O1 Mo4 F14 Mo3 44.0(2) 3 . . 1_565 ?
 O1 Mo4 F14 K2 -44.9(2) 3 . . 4_464 ?
 O1 Mo4 F14 K2 132.9(3) 3 . . 2_564 ?
 O1 Mo4 F14 K6 -136.0(2) 3 . . 2_564 ?
 O1 Mo4 O19 K4 13.2(4) 3 . . 4_465 ?
 O1 Mo4 O19 K4 -101.2(3) 3 . . 2_565 ?
 O1 Mo4 O19 K5 136.0(2) 3 . . . ?
 O1 K2 F5 Mo1 -147.6(2) 2_565 . . . ?
 O1 K2 F5 K3 -44.8(3) 2_565 . . 2 ?
 O1 K2 F5 K4 101.8(3) 2_565 . . 2_565 ?
 O1 K2 F7 Mo1 146.9(3) 2_565 . . . ?
 O1 K2 F7 K1 13.9(4) 2_565 . . 2 ?
 O1 K2 F7 K3 -112.5(3) 2_565 . . . ?
 O1 K2 F10 Mo1 -3.0(5) 2_565 . . 2 ?
 O1 K2 F10 K1 -109.9(2) 2_565 . . 2 ?
 O1 K2 F10 K3 158.9(3) 2_565 . . 2 ?
 O1 K2 F12 Mo2 -135.5(3) 2_565 . . . ?
 O1 K2 F12 K3 129.16(18) 2_565 . . . ?
 O1 K2 F12 K6 25.7(3) 2_565 . . . ?
 O1 K4 F8 Mo2 -50.8(3) 2_564 . . 2_564 ?
 O1 K4 F8 K1 105.9(3) 2_564 . . . ?
 O1 K4 F8 K2 -157.8(2) 2_564 . . 2_564 ?
 O1 K4 F11 Mo2 160.8(4) 2_564 . . . ?
 O1 K4 F11 K1 -87.0(3) 2_564 . . . ?
 O1 K4 F11 K3 5.7(5) 2_564 . . . ?
 O1 K5 F4 Mo1 -38.8(6) 3_545 . . . ?
 O1 K5 F4 Mo1 -34.9(3) 1_545 . . . ?
 O1 K5 F4 K1 78.6(2) 1_545 . . . ?
 O1 K5 F4 K1 74.7(4) 3_545 . . . ?
 O1 K5 F4 K4 -167.8(3) 1_545 . . 2_565 ?
 O1 K5 F4 K4 -171.7(3) 3_545 . . 2_565 ?
 O1 K5 F15 Mo3 100.4(3) 1_545 . . . ?
 O1 K5 F15 Mo3 51.2(3) 3_545 . . . ?
 O1 K5 F15 K1 -109.8(3) 1_545 . . . ?
 O1 K5 F15 K1 -159.0(3) 3_545 . . . ?
 O1 K5 F15 K2 -61.8(2) 3_545 . . 2_554 ?
 O1 K5 F15 K2 -12.59(18) 1_545 . . 2_554 ?
 O1 K5 O19 Mo4 -58.4(5) 3_545 . . . ?
 O1 K5 O19 Mo4 58.4(5) 1_545 . . . ?
 O1 K5 O19 K4 -179.5(3) 3_545 . . 2_565 ?
 O1 K5 O19 K4 -62.8(8) 1_545 . . 2_565 ?
 O1 K5 O19 K4 179.5(3) 1_545 . . 4_465 ?
 O1 K5 O19 K4 62.8(8) 3_545 . . 4_465 ?
 O3 Mo4 F1 K2 -61.2(10) 3 . . 2_564 ?
 O3 Mo4 F1 K4 -174.8(8) 3 . . 2_565 ?
 O3 Mo4 F1 K5 56.2(10) 3 . . 1_565 ?
 O3 Mo4 F3 K1 -119.7(4) 3 . . . ?
 O3 Mo4 F3 K2 132.19(15) 3 . . 2_564 ?
 O3 Mo4 F3 K6 40.1(3) 3 . . 2_564 ?
 O3 Mo4 F14 Mo3 133.00(19) 3 . . 1_565 ?
 O3 Mo4 F14 K2 -138.1(3) 3 . . 2_564 ?
 O3 Mo4 F14 K2 44.1(2) 3 . . 4_464 ?
 O3 Mo4 F14 K6 -47.00(19) 3 . . 2_564 ?
 O3 Mo4 O19 K4 -75.8(4) 3 . . 4_465 ?
 O3 Mo4 O19 K4 169.8(3) 3 . . 2_565 ?
 O3 Mo4 O19 K5 47.0(2) 3 . . . ?
 O3 K2 F5 Mo1 128.0(3) 2_565 . . . ?
 O3 K2 F5 K3 -129.2(3) 2_565 . . 2 ?
 O3 K2 F5 K4 17.4(4) 2_565 . . 2_565 ?
 O3 K2 F7 Mo1 -100.9(5) 2_565 . . . ?
 O3 K2 F7 K1 126.1(4) 2_565 . . 2 ?
 O3 K2 F7 K3 -0.3(6) 2_565 . . . ?
 O3 K2 F10 Mo1 -26.8(7) 2_565 . . 2 ?
 O3 K2 F10 K1 -133.7(2) 2_565 . . 2 ?
 O3 K2 F10 K3 135.1(2) 2_565 . . 2 ?
 O3 K2 F12 Mo2 -113.3(4) 2_565 . . . ?
 O3 K2 F12 K3 151.4(2) 2_565 . . . ?
 O3 K2 F12 K6 47.9(2) 2_565 . . . ?
 O3 K6 F12 Mo2 112.8(5) 2_565 . . . ?
 O3 K6 F12 Mo2 119.1(5) 4_565 . . . ?
 O3 K6 F12 K2 -37.9(3) 4_565 . . . ?
 O3 K6 F12 K2 -44.1(2) 2_565 . . . ?
 O3 K6 F12 K3 -142.0(2) 2_565 . . . ?
 O3 K6 F12 K3 -135.73(19) 4_565 . . . ?
 O4 K4 F8 Mo2 53.4(3) 2_564 . . 2_564 ?
 O4 K4 F8 K1 -149.9(3) 2_564 . . . ?
 O4 K4 F8 K2 -53.6(3) 2_564 . . 2_564 ?
 O4 K4 F11 Mo2 -15.4(7) 2_564 . . . ?
 O4 K4 F11 K1 96.9(3) 2_564 . . . ?
 O4 K4 F11 K3 -170.5(2) 2_564 . . . ?
 O4 K5 F4 Mo1 151.6(2) 3 . . . ?
 O4 K5 F4 K1 -94.9(4) 3 . . . ?
 O4 K5 F4 K4 18.7(6) 3 . . 2_565 ?
 O4 K5 F15 Mo3 -37.1(3) 3 . . . ?
 O4 K5 F15 K1 112.7(3) 3 . . . ?
 O4 K5 F15 K2 -150.1(2) 3 . . 2_554 ?
 O4 K5 O19 Mo4 -95.0(2) 3 . . . ?
 O4 K5 O19 K4 26.2(2) 3 . . 4_465 ?
 O4 K5 O19 K4 143.9(5) 3 . . 2_565 ?
 O5 K3 F2 Mo1 61.7(3) 2_554 . . . ?
 O5 K3 F2 Mo2 -128.5(2) 2_554 . . . ?
 O5 K3 F2 K1 -31.9(2) 2_554 . . . ?
 O5 K3 F7 Mo1 -66.3(2) 2_554 . . . ?
 O5 K3 F7 K1 86.3(3) 2_554 . . 2 ?
 O5 K3 F7 K2 -176.56(19) 2_554 . . . ?
 O5 K3 F11 Mo2 139.7(3) 2_554 . . . ?
 O5 K3 F11 K1 47.4(2) 2_554 . . . ?
 O5 K3 F11 K4 -57.9(3) 2_554 . . . ?
 O5 K3 F12 Mo2 -4.6(7) 2_554 . . . ?
 O5 K3 F12 K2 113.4(6) 2_554 . . . ?
 O5 K3 F12 K6 -140.0(5) 2_554 . . . ?
 O5 K4 F8 Mo2 99.2(3) 2_564 . . 2_564 ?
 O5 K4 F8 K1 -104.2(4) 2_564 . . . ?
 O5 K4 F8 K2 -7.9(2) 2_564 . . 2_564 ?
 O5 K4 F11 Mo2 -25.6(5) 2_564 . . . ?
 O5 K4 F11 K1 86.6(2) 2_564 . . . ?
 O5 K4 F11 K3 179.2(3) 2_564 . . . ?
 O6 K2 F5 Mo1 176.2(3) 2_565 . . . ?
 O6 K2 F5 K3 -80.9(2) 2_565 . . 2 ?
 O6 K2 F5 K4 65.7(3) 2_565 . . 2_565 ?
 O6 K2 F7 Mo1 37.5(5) 2_565 . . . ?
 O6 K2 F7 K1 -95.5(3) 2_565 . . 2 ?
 O6 K2 F7 K3 138.2(2) 2_565 . . . ?
 O6 K2 F10 Mo1 -77.1(6) 2_565 . . 2 ?
 O6 K2 F10 K1 176.1(2) 2_565 . . 2 ?
 O6 K2 F10 K3 84.9(3) 2_565 . . 2 ?
 O6 K2 F12 Mo2 -55.5(4) 2_565 . . . ?
 O6 K2 F12 K3 -150.8(2) 2_565 . . . ?
 O6 K2 F12 K6 105.7(3) 2_565 . . . ?
 O6 K4 F8 Mo2 -14.0(2) 2_564 . . 2_564 ?
 O6 K4 F8 K1 142.6(4) 2_564 . . . ?
 O6 K4 F8 K2 -121.0(3) 2_564 . . 2_564 ?
 O6 K4 F11 Mo2 -110.6(5) 2_564 . . . ?
 O6 K4 F11 K1 1.6(3) 2_564 . . . ?
 O6 K4 F11 K3 94.2(3) 2_564 . . . ?
 O7 K1 F2 Mo1 -84.5(2) 2_554 . . . ?
 O7 K1 F2 Mo2 112.5(2) 2_554 . . . ?
 O7 K1 F2 K3 12.5(2) 2_554 . . . ?
 O7 K1 F3 Mo4 138.0(4) 2_554 . . . ?
 O7 K1 F3 K2 -109.9(2) 2_554 . . 2_564 ?
 O7 K1 F3 K6 -18.4(4) 2_554 . . 2_564 ?
 O7 K1 F4 Mo1 55.2(4) 2_554 . . . ?
 O7 K1 F4 K4 167.5(2) 2_554 . . 2_565 ?
 O7 K1 F4 K5 -70.1(3) 2_554 . . . ?
 O7 K1 F6 Mo2 -46.4(5) 2_554 . . . ?
 O7 K1 F6 K2 94.1(4) 2_554 . . 2_564 ?
 O7 K1 F6 K4 -153.5(3) 2_554 . . 2_565 ?
 O7 K1 F8 Mo2 70.9(4) 2_554 . . 2_564 ?
 O7 K1 F8 K2 163.1(2) 2_554 . . 2_564 ?
 O7 K1 F8 K4 -82.4(4) 2_554 . . . ?
 O7 K1 F11 Mo2 -165.9(3) 2_554 . . . ?
 O7 K1 F11 K3 -57.4(2) 2_554 . . . ?
 O7 K1 F11 K4 53.5(2) 2_554 . . . ?
 O7 K1 F15 Mo3 -70.1(4) 2_554 . . . ?
 O7 K1 F15 K2 36.44(19) 2_554 . . 2_554 ?
 O7 K1 F15 K5 148.5(3) 2_554 . . . ?
 O8 Mo2 F2 Mo1 5.9(11) 2_565 . . . ?
 O8 Mo2 F2 K1 124.7(3) 2_565 . . . ?
 O8 Mo2 F2 K3 -141.9(3) 2_565 . . . ?
 O8 Mo2 F6 K1 -122.3(3) 2_565 . . . ?
 O8 Mo2 F6 K2 125.0(5) 2_565 . . 2_564 ?
 O8 Mo2 F6 K4 -15.8(2) 2_565 . . 2_565 ?
 O8 Mo2 F11 K1 53.9(10) 2_565 . . . ?
 O8 Mo2 F11 K3 -33.9(11) 2_565 . . . ?
 O8 Mo2 F11 K4 170.6(8) 2_565 . . . ?
 O8 Mo2 F12 K2 31.4(3) 2_565 . . . ?
 O8 Mo2 F12 K3 127.7(2) 2_565 . . . ?
 O8 Mo2 F12 K6 -123.3(5) 2_565 . . . ?
 O8 Mo2 O16 K3 -83.5(14) 2_565 . . 1_565 ?
 O10 Mo1 F2 Mo2 165.1(11) 2_554 . . . ?
 O10 Mo1 F2 K1 45.9(2) 2_554 . . . ?
 O10 Mo1 F2 K3 -46.9(3) 2_554 . . . ?
 O10 Mo1 F4 K1 -32.4(3) 2_554 . . . ?
 O10 Mo1 F4 K4 -137.9(3) 2_554 . . 2_565 ?
 O10 Mo1 F4 K5 86.8(3) 2_554 . . . ?
 O10 Mo1 F5 K2 -63.7(9) 2_554 . . . ?
 O10 Mo1 F5 K3 -174.0(8) 2_554 . . 2 ?
 O10 Mo1 F5 K4 57.0(9) 2_554 . . 2_565 ?
 O10 Mo1 F7 K1 -117.1(4) 2_554 . . 2 ?
 O10 Mo1 F7 K2 136.3(3) 2_554 . . . ?
 O10 Mo1 F7 K3 33.6(2) 2_554 . . . ?
 O10 Mo1 O17 K3 171.4(3) 2_554 . . 2 ?
 O10 Mo1 O17 K4 26.5(8) 2_554 . . 2 ?
 O10 K1 F2 Mo1 -36.3(2) 2_554 . . . ?
 O10 K1 F2 Mo2 160.7(3) 2_554 . . . ?
 O10 K1 F2 K3 60.7(2) 2_554 . . . ?
 O10 K1 F3 Mo4 26.0(6) 2_554 . . . ?
 O10 K1 F3 K2 138.2(2) 2_554 . . 2_564 ?
 O10 K1 F3 K6 -130.4(3) 2_554 . . 2_564 ?
 O10 K1 F4 Mo1 25.8(2) 2_554 . . . ?
 O10 K1 F4 K4 138.0(3) 2_554 . . 2_565 ?
 O10 K1 F4 K5 -99.5(3) 2_554 . . . ?
 O10 K1 F6 Mo2 43.6(4) 2_554 . . . ?
 O10 K1 F6 K2 -175.82(17) 2_554 . . 2_564 ?
 O10 K1 F6 K4 -63.5(3) 2_554 . . 2_565 ?
 O10 K1 F8 Mo2 123.5(4) 2_554 . . 2_564 ?
 O10 K1 F8 K2 -144.3(2) 2_554 . . 2_564 ?
 O10 K1 F8 K4 -29.7(5) 2_554 . . . ?
 O10 K1 F11 Mo2 -90.9(2) 2_554 . . . ?
 O10 K1 F11 K3 17.6(2) 2_554 . . . ?
 O10 K1 F11 K4 128.4(2) 2_554 . . . ?
 O10 K1 F15 Mo3 -147.3(5) 2_554 . . . ?
 O10 K1 F15 K2 -40.70(17) 2_554 . . 2_554 ?
 O10 K1 F15 K5 71.4(3) 2_554 . . . ?
 O10 K3 F2 Mo1 35.7(2) 2_554 . . . ?
 O10 K3 F2 Mo2 -154.5(4) 2_554 . . . ?
 O10 K3 F2 K1 -57.9(2) 2_554 . . . ?
 O10 K3 F7 Mo1 -25.97(17) 2_554 . . . ?
 O10 K3 F7 K1 126.6(3) 2_554 . . 2 ?
 O10 K3 F7 K2 -136.2(3) 2_554 . . . ?
 O10 K3 F11 Mo2 75.5(3) 2_554 . . . ?
 O10 K3 F11 K1 -16.78(19) 2_554 . . . ?
 O10 K3 F11 K4 -122.1(3) 2_554 . . . ?
 O10 K3 F12 Mo2 -53.7(3) 2_554 . . . ?
 O10 K3 F12 K2 64.2(2) 2_554 . . . ?
 O10 K3 F12 K6 170.9(2) 2_554 . . . ?
 O12 K6 F12 Mo2 -136.7(14) 3_655 . . . ?
 O12 K6 F12 K2 66.4(19) 3_655 . . . ?
 O12 K6 F12 K3 -31.4(19) 3_655 . . . ?
 O13 Mo3 F13 K2 -129.8(2) 3 . . 2_554 ?
 O13 Mo3 F13 K3 92.7(6) 3 . . 2_554 ?
 O13 Mo3 F13 K6 -40.6(4) 3 . . 2_554 ?
 O13 Mo3 F15 K1 151.2(8) 3 . . . ?
 O13 Mo3 F15 K2 51.9(11) 3 . . 2_554 ?
 O13 Mo3 F15 K5 -65.7(10) 3 . . . ?
 O13 Mo3 O18 K6 134.5(3) 3 . . 2_564 ?
 O13 K3 F2 Mo1 -92.9(3) 2 . . . ?
 O13 K3 F2 Mo2 76.9(3) 2 . . . ?
 O13 K3 F2 K1 173.5(2) 2 . . . ?
 O13 K3 F7 Mo1 150.4(3) 2 . . . ?
 O13 K3 F7 K1 -57.1(3) 2 . . 2 ?
 O13 K3 F7 K2 40.1(2) 2 . . . ?
 O13 K3 F11 Mo2 -45.4(4) 2 . . . ?
 O13 K3 F11 K1 -137.7(2) 2 . . . ?
 O13 K3 F11 K4 116.9(3) 2 . . . ?
 O13 K3 F12 Mo2 -172.4(4) 2 . . . ?
 O13 K3 F12 K2 -54.5(3) 2 . . . ?
 O13 K3 F12 K6 52.2(3) 2 . . . ?
 O13 K6 F12 Mo2 -145.4(6) 2 . . . ?
 O13 K6 F12 K2 57.7(2) 2 . . . ?
 O13 K6 F12 K3 -40.2(2) 2 . . . ?
 O15 Mo3 F13 K2 -48.0(11) 3 . . 2_554 ?
 O15 Mo3 F13 K3 174.5(7) 3 . . 2_554 ?
 O15 Mo3 F13 K6 41.2(11) 3 . . 2_554 ?
 O15 Mo3 F15 K1 -131.5(3) 3 . . . ?
 O15 Mo3 F15 K2 129.27(19) 3 . . 2_554 ?
 O15 Mo3 F15 K5 11.7(4) 3 . . . ?
 O15 Mo3 O18 K6 44.9(2) 3 . . 2_564 ?
 O15 K5 F4 Mo1 -126.6(3) 3 . . . ?
 O15 K5 F4 K1 -13.1(3) 3 . . . ?
 O15 K5 F4 K4 100.5(3) 3 . . 2_565 ?
 O15 K5 F15 Mo3 -9.5(3) 3 . . . ?
 O15 K5 F15 K1 140.32(18) 3 . . . ?
 O15 K5 F15 K2 -122.45(16) 3 . . 2_554 ?
 O15 K5 O19 Mo4 -28.16(14) 3 . . . ?
 O15 K5 O19 K4 -149.3(4) 3 . . 2_565 ?
 O15 K5 O19 K4 93.0(3) 3 . . 4_465 ?
 O16 Mo2 F6 K1 138.8(4) . . . . ?
 O16 Mo2 F6 K2 26.1(6) . . . 2_564 ?
 O16 Mo2 F6 K4 -114.7(4) . . . 2_565 ?
 O16 Mo2 F11 K1 -132.6(3) . . . . ?
 O16 Mo2 F11 K3 139.6(4) . . . . ?
 O16 Mo2 F11 K4 -16.0(6) . . . . ?
 O16 Mo2 F12 K2 130.1(4) . . . . ?
 O16 Mo2 F12 K3 -133.6(3) . . . . ?
 O16 Mo2 F12 K6 -24.6(6) . . . . ?
 O16 K3 F2 Mo1 -4.6(3) 1_545 . . . ?
 O16 K3 F2 Mo2 165.1(2) 1_545 . . . ?
 O16 K3 F2 K1 -98.3(2) 1_545 . . . ?
 O16 K3 F7 Mo1 -109.0(3) 1_545 . . . ?
 O16 K3 F7 K1 43.6(3) 1_545 . . 2 ?
 O16 K3 F7 K2 140.7(3) 1_545 . . . ?
 O16 K3 F11 Mo2 78.4(9) 1_545 . . . ?
 O16 K3 F11 K1 -13.9(8) 1_545 . . . ?
 O16 K3 F11 K4 -119.2(7) 1_545 . . . ?
 O16 K3 F12 Mo2 -127.7(3) 1_545 . . . ?
 O16 K3 F12 K2 -9.7(4) 1_545 . . . ?
 O16 K3 F12 K6 96.9(4) 1_545 . . . ?
 O17 Mo1 F4 K1 -133.8(3) . . . . ?
 O17 Mo1 F4 K4 120.7(4) . . . 2_565 ?
 O17 Mo1 F4 K5 -14.6(4) . . . . ?
 O17 Mo1 F5 K2 119.5(4) . . . . ?
 O17 Mo1 F5 K3 9.2(4) . . . 2 ?
 O17 Mo1 F5 K4 -119.7(4) . . . 2_565 ?
 O17 Mo1 F7 K1 -15.1(5) . . . 2 ?
 O17 Mo1 F7 K2 -121.7(4) . . . . ?
 O17 Mo1 F7 K3 135.6(3) . . . . ?
 O17 K3 F2 Mo1 120.8(2) 2_554 . . . ?
 O17 K3 F2 Mo2 -69.5(3) 2_554 . . . ?
 O17 K3 F2 K1 27.2(2) 2_554 . . . ?
 O17 K3 F7 Mo1 -13.5(5) 2_554 . . . ?
 O17 K3 F7 K1 139.1(4) 2_554 . . 2 ?
 O17 K3 F7 K2 -123.7(4) 2_554 . . . ?
 O17 K3 F11 Mo2 171.7(4) 2_554 . . . ?
 O17 K3 F11 K1 79.4(2) 2_554 . . . ?
 O17 K3 F11 K4 -25.9(3) 2_554 . . . ?
 O17 K3 F12 Mo2 47.9(3) 2_554 . . . ?
 O17 K3 F12 K2 165.9(2) 2_554 . . . ?
 O17 K3 F12 K6 -87.5(3) 2_554 . . . ?
 O17 K4 F8 Mo2 -105.5(3) 2_554 . . 2_564 ?
 O17 K4 F8 K1 51.1(3) 2_554 . . . ?
 O17 K4 F8 K2 147.4(3) 2_554 . . 2_564 ?
 O17 K4 F11 Mo2 -178.5(6) 2_554 . . . ?
 O17 K4 F11 K1 -66.3(3) 2_554 . . . ?
 O17 K4 F11 K3 26.3(3) 2_554 . . . ?
 O18 Mo3 F13 K2 130.4(4) . . . 2_554 ?
 O18 Mo3 F13 K3 -7.1(8) . . . 2_554 ?
 O18 Mo3 F13 K6 -140.4(4) . . . 2_554 ?
 O18 Mo3 F15 K1 -30.4(5) . . . . ?
 O18 Mo3 F15 K2 -129.7(4) . . . 2_554 ?
 O18 Mo3 F15 K5 112.7(4) . . . . ?
 O18 K6 F12 Mo2 52.2(6) 2_565 . . . ?
 O18 K6 F12 K2 -104.8(4) 2_565 . . . ?
 O18 K6 F12 K3 157.4(3) 2_565 . . . ?
 O19 Mo4 F1 K2 128.5(3) . . . 2_564 ?
 O19 Mo4 F1 K4 14.9(4) . . . 2_565 ?
 O19 Mo4 F1 K5 -114.2(4) . . . 1_565 ?
 O19 Mo4 F3 K1 -19.4(6) . . . . ?
 O19 Mo4 F3 K2 -127.5(4) . . . 2_564 ?
 O19 Mo4 F3 K6 140.5(4) . . . 2_564 ?
 O19 K5 F4 Mo1 163.7(5) . . . . ?
 O19 K5 F4 K1 -82.8(4) . . . . ?
 O19 K5 F4 K4 30.8(4) . . . 2_565 ?
 O19 K5 F15 Mo3 -96.5(3) . . . . ?
 O19 K5 F15 K1 53.3(3) . . . . ?
 O19 K5 F15 K2 150.5(2) . . . 2_554 ?
